1 **SOX21 modulates SOX2-initiated differentiation of epithelial cells in the**  
2 **extrapulmonary airways**

3

4 Evelien Eenjes<sup>1</sup>, Marjon Buscop- van Kempen<sup>1</sup>, Anne Boerema- de Munck<sup>1</sup>, Lisette de Kreij- de  
5 Bruin<sup>1</sup>, J. Marco Schnater<sup>1</sup>, Dick Tibboel<sup>1</sup>, Jennifer J.P. Collins<sup>1</sup> and Robbert J. Rottier\*<sup>1, 2</sup>

6

7 <sup>1</sup> Department of Pediatric Surgery, Erasmus Medical Center – Sophia Children’s Hospital,  
8 Rotterdam, The Netherlands; <sup>2</sup> Department of Cell biology, Erasmus MC, Rotterdam, the  
9 Netherlands

10

11 \* Correspondence: [r.rottier@erasmusmc.nl](mailto:r.rottier@erasmusmc.nl)

12

13 Dr R.J. Rottier

14 Erasmus Medical Center-Sophia Children's Hospital

15 Department of Pediatric Surgery and Cell Biology

16 Wytemaweg 80

17 P.O. Box 2040

18 3000 CA Rotterdam

19 The Netherlands

20

21

22 **ABSTRACT**

23 SOX2 expression levels are crucial for the balance between maintenance and differentiation  
24 of airway progenitor cells during development and regeneration. Here, we describe SOX21  
25 patterning of the proximal airway epithelium which coincides with high levels of SOX2.  
26 Airway progenitor cells in this SOX2+/SOX21+ zone show differentiation to basal cells,  
27 specifying cells for the extrapulmonary airways. We show that loss of SOX21 results in  
28 increased differentiation of progenitor cells during murine lung development. SOX21 inhibits  
29 SOX2-induced differentiation by antagonizing SOX2 binding on different promoters. SOX21  
30 remains expressed in adult tracheal epithelium and submucosal glands, where SOX21  
31 modulates SOX2-induced differentiation in a similar fashion. Using fetal lung organoids and  
32 adult bronchial epithelial cells, we show that SOX2+SOX21+ regionalization is conserved in  
33 human. Thus SOX21 modulates SOX2-initiated differentiation in extrapulmonary epithelial  
34 cells during development and regeneration after injury.

35

36

37

## 38 INTRODUCTION

39 The lung is composed of a highly branched tubular system of airways lined with specific cell  
40 types, which together moisten, warm the air and filter out inhaled substances. The alveoli are  
41 located at the distal end of the airways. They consist of a thin layer of epithelium encircled by  
42 a network of blood vessels to facilitate an exchange of oxygen and carbon dioxide. During  
43 lung development, both growth and subsequent differentiation along the proximal-distal axis  
44 occur simultaneously. A well-regulated balance between progenitor cell maintenance,  
45 proliferation and differentiation is essential to ensure a fully functional lung at birth.

46  
47 The formation of lung endoderm starts from the ventral anterior foregut by the development  
48 of two lung buds, forming the basis of the left and right lung. As the growing lung buds  
49 expand, the future trachea is separated from the esophagus proximal of the lung buds.  
50 Through a repetitive process of branching of the growing tips and outgrowth of the newly  
51 formed branches, a complex bronchial tree develops (Metzger, Klein et al. 2008) and  
52 regionalization of the branching structures occurs along the proximal-distal axis. Distal  
53 progenitors expressing the SRY-box protein SOX9 and the HLH protein ID2 generate new  
54 branches and will ultimately give rise to alveolar cells (Rawlins, Clark et al. 2009). While the  
55 buds grow and expand, SOX9+ progenitor cells gradually become more distant from the  
56 branch-inducing FGF10 signal secreted by the distal mesenchymal cells, resulting in loss of  
57 SOX9 expression and initiation of SOX2 expression (Park, Miranda et al. 1998, Weaver,  
58 Yingling et al. 1999). These SOX2+ progenitor cells mark the non-branching epithelium and  
59 give rise to the airway lineages.

60  
61 SOX2 is a critical transcription factor in the development of the airways and epithelium  
62 lineages. Deficiency of SOX2 resulted in aberrant tracheobronchial epithelium due to the loss  
63 of basal cells (Rock, Onaitis et al. 2009, Tompkins, Besnard et al. 2009, Wang, Tian et al.  
64 2013). In contrast, overexpression of SOX2 leads to an increase in basal cells and in addition  
65 to a defect in branching morphogenesis (Gontan, de Munck et al. 2008, Ochieng, Schilders  
66 et al. 2014). The requirement of proper SOX2 levels in airway development is well  
67 documented, but it is not clear how the balance between SOX2+ progenitor maintenance  
68 and early cell fate determination is regulated.

69  
70 Previously, we showed that increased SOX2 expression during lung development leads to  
71 increased SOX21 expression in airway epithelium (Gontan, de Munck et al. 2008). While the  
72 function of SOX21 in lung development is not known, SOX21 was found to be enriched in  
73 SOX2+ stalk (differentiating bronchiole) versus tip progenitor cells of the human fetal lung  
74 (Nikolic, Caritg et al. 2017). Moreover, concomitant expression of SOX2 and SOX21 results

75 in either a synergistic or antagonistic function depending on the tissue or environmental  
76 stimuli (Mallanna, Ormsbee et al. 2010, Freeman and Daudet 2012, Whittington,  
77 Cunningham et al. 2015, Goolam, Scialdone et al. 2016).

78

79 We hypothesized that SOX21 is an important regulator of SOX2+ progenitor maintenance  
80 during development and regeneration of airway epithelium. In this study, we demonstrate  
81 that SOX21 demarcates a region in the proximal-distal patterning of the airway tree during  
82 lung development. In this SOX21 positive region differentiation occurs of SOX2+ progenitor  
83 cells to basal cells and defines the epithelium of the extrapulmonary airways. Using  
84 heterozygous SOX2, SOX21 and full SOX21 knock-out mice, we show that variable levels of  
85 SOX21 antagonizes SOX2 function by suppressing the differentiation of progenitor cells  
86 during lung development. In the adult lung, co-expression of SOX2 and SOX21 is maintained  
87 in the extrapulmonary airways. Basal cells with reduced SOX21 levels lose stemness and  
88 are more prone to differentiate, similar to what is seen in proximal epithelial progenitor cells  
89 during lung development. Taken together, our results demonstrate that reduced levels of  
90 SOX2 or SOX21 compromise airway progenitor cell maintenance and differentiation during  
91 lung development and regeneration.

92

93

## 94 RESULTS

95

### 96 **SOX2 and SOX21 regionalize the trachea and main bronchi in a proximal-distal pattern** 97 **during branching morphogenesis**

98 To gain more insight into the interplay between SOX2 and SOX21, we first examined the  
99 spatial and temporal distribution of SOX21 in lung epithelium with respect to the SOX2-SOX9  
100 proximal-distal patterning at different stages of lung development.

101

102 The earliest expression of SOX21 during lung development was found at gestational age  
103 E11.5. A few cells expressing SOX21 were located in the most proximal region of the SOX2+  
104 epithelium (Fig. 1A). This indicates that SOX2 precedes SOX21 expression which can be  
105 detected at E9.5 (Que, Okubo et al. 2007, Gontan, de Munck et al. 2008). At E11.5,  
106 abundant expression of SOX21 is seen in cells of the thymus and esophagus which also co-  
107 expressed SOX2. At E12.5, SOX21 expression became more apparent, but stayed restricted  
108 to the proximal part of SOX2+ epithelium, the trachea and main bronchi. From E13.5  
109 onwards, SOX21 expression started to be expressed throughout the trachea and main  
110 bronchi, but was absent in the smaller SOX2+ airways. Four different zones in the  
111 developing lung epithelium could be distinguished throughout lung development (Fig. 1A):  
112 zone 1, the most proximal zone, the developing trachea and main bronchi, which consists of  
113 SOX2+ and SOX21+ airway epithelial cells; zone 2, which contains SOX2+ only airway  
114 epithelial cells; zone 3, a transition zone, in which distal SOX9+ progenitors transition into  
115 SOX2+ airway progenitors (Mahoney, Mori et al. 2014); and zone 4, the most distal part of  
116 the lung epithelium which contains the SOX9+ progenitors (Rawlins, Clark et al. 2009) (Fig.  
117 1A). SOX21 was never observed in the distal buds and always in cells that also express  
118 SOX2. SOX21 is heterogeneously expressed between cells during the early developmental  
119 stages (E12.5-E14.5) and in the transition between zone 1 to zone 2 at later ages (>E15.5),  
120 in contrast to the homogeneous distribution of SOX2 (Fig. 1A). At E18.5, SOX21 remains  
121 expressed in the trachea, heterogeneously expressed in the main bronchi and absent in the  
122 intrapulmonary airways (Fig. 1A). Thus, SOX21 is expressed during the formation of the  
123 airway tree and is located in the extrapulmonary airways, which is the most proximal part of  
124 the SOX2+ epithelium.

125

126 In addition to this patterning, we observe a unilateral expression of SOX21 in the main  
127 bronchi, starting from the bifurcation of the trachea (Fig. 1A, S1A). SOX21 is almost absent  
128 at the lateral side, whereas SOX21 is abundantly expressed at the medial side of the airway  
129 (Fig S1A). Previous research showed that a higher expression of SOX2 was found in the  
130 dorsal tracheal epithelium compared to the ventral side of the tracheal epithelium during

131 development (Que, Luo et al. 2009). In the developing trachea, SOX9+ cartilage nodules are  
132 found on the ventral side and Smooth Muscle Actin+ (SMA+) mesenchymal cells on the  
133 dorsal side (Hines, Jones et al. 2013). We made transverse sections from the trachea up to  
134 the main bronchi and observed a more abundant expression of SOX21 at the dorsal side,  
135 comparable to the location of high SOX2 levels (Fig. 1B). This unilateral expression pattern is  
136 present during branching morphogenesis but becomes less apparent after E15.5 (Fig. S1A).  
137 We hypothesized that the high expression of SOX2, specifically on the dorsal side of the  
138 trachea and main bronchi, is important for setting up the expression pattern of SOX21 during  
139 lung development.

140

141 To confirm whether increased levels of SOX2 induce expression of *Sox21*, we ectopically  
142 overexpressed a MYC-tagged SOX2 by using a tetracycline-inducible *Sox2* transgene under  
143 an SPC promoter-driven *rtTA* (Gontan et al, 2008) (Fig. S1B). SOX2 overexpressing cells  
144 showed a loss of SOX9 and an induction of SOX21 in the distal lung buds, thereby forcing  
145 distal progenitor cells to a proximal cell fate (Fig. 1C). Next, we generated a similar mouse  
146 model with a doxycycline inducible *Myc*-tagged *Sox21* transgene (Fig. S1B). Similar to the  
147 overexpression of SOX2, the induction of SOX21 results in the appearance of cystic  
148 structures, albeit much smaller (Fig. S1C). Further analysis showed that cells ectopically  
149 expressing SOX21 remained SOX9 positive and lacked SOX2 in the distal bud (Fig. 1C).  
150 Thus, SOX21 alone is not sufficient to induce a SOX2+ airway cell fate in the presence of  
151 distal mesenchymal signaling.

152

### 153 **SOX21 and SOX2 are co-expressed in a zone prone to progenitor cell differentiation**

154 SOX21 marks a specific proximal region of the airway tree during development and we  
155 therefore asked the question whether this region is distinct from zone 2, which is only  
156 positive for SOX2. Early in development, at E11.5, SOX2 and SOX21 were both expressed  
157 in the lung, esophagus and thymus. At this embryonic age, the esophagus and thymus  
158 already contained TRP63+ epithelial cell progenitors (Fig. 2A), while TRP63+ basal cells only  
159 appeared in the lung at E12.5 (Fig. 2A, 2B). We previously showed that SOX2 directly  
160 regulates the expression of TRP63 (Ochieng, Schilders et al. 2014), and we therefore  
161 analyzed whether SOX21 plays a role in the differentiation of airway progenitor cells to basal  
162 cells. We found that basal cells appear from E12.5 onward in zone 1, but not in zone 2 (Fig.  
163 2A, 2B). At E14.5, SOX2 and SOX21 are prominently expressed in epithelial cells in close  
164 proximity to SMA-expressing mesenchymal cells (Fig. 1). Consistent with previous findings  
165 (Que, Luo et al. 2009), we indeed found an increased percentage of basal cells at the medial  
166 compared to the lateral side and at the dorsal versus ventral side (Fig. 2B, S2A), suggesting

167 that crosstalk between the mesenchyme and epithelium is necessary for combined SOX21  
168 and SOX2 expression and subsequent basal cell differentiation (Fig. 2C).

169 Additionally, in SOX2 or SOX21 overexpressing mice, zone 1 is extended. Within the  
170 extended zone, basal cells were present even in the absence of proximal mesenchymal-  
171 epithelial crosstalk, showing that induction of both SOX2 and SOX21 is sufficient for the  
172 differentiation of SOX2 progenitors to airway basal cells (Fig. 2D).

173

### 174 **SOX21 and SOX2 regulate maintenance and differentiation of the airway progenitor** 175 **state**

176 Next, we studied the effect of reduced levels of SOX21 on the differentiation to basal cells in  
177 *Sox21* heterozygous and homozygous knockout mice. *Sox21* knock-out (*Sox21*<sup>-/-</sup>) mice do  
178 not show respiratory distress at birth (Kiso, Tanaka et al. 2009). Their lungs are smaller than  
179 wild type littermate controls, but have no apparent branching defect (data not shown).  
180 However, an increased number of basal cells is present in *Sox21* heterozygous mice  
181 (*Sox21*<sup>+/-</sup>), which is even more pronounced in *Sox21*<sup>-/-</sup> mice (Fig. 3A). Contrasting this  
182 increased number of basal cells, a decrease in the number of basal cells is observed in lungs  
183 of *Sox2* heterozygous mice (*Sox2*<sup>+/-</sup>) at E14.5 (Fig. S2B), corresponding with the dose-  
184 dependent role described for SOX2 in airway differentiation (Que, Okubo et al. 2007).  
185 Hence, SOX2 and SOX21 must have opposite effects. SOX21 maintains the SOX2  
186 progenitor state and prevents differentiation, while SOX2 expression is important to initiate  
187 progenitor to basal cell differentiation.

188 To identify whether SOX21 and SOX2 levels are important for further differentiation to airway  
189 specific cell types, we also investigated the differentiation to ciliated cells. These start to  
190 appear at E14.5 and can be quantified using TRP73, an early marker for differentiation, and  
191 FOXJ1, a more mature marker (Marshall, Mays et al. 2016). At E14.5, we detect a small  
192 increase in the number of TRP73+ and FOXJ1+ ciliated cells present in the *Sox21*<sup>+/-</sup> airways  
193 and an even larger increase in the *Sox21*<sup>-/-</sup> airways (Fig. 3B, C). This again demonstrates  
194 that SOX21 levels are important for maintenance of the progenitor state and suppression of  
195 differentiation. In the *Sox2*<sup>+/-</sup> mice, we observed no difference in the number of TRP73+ and  
196 FOXJ1+ ciliated cells (Fig. S2C, D), suggesting that decreased levels of SOX2 does not  
197 influence the initiation of ciliated cells despite that SOX2 can regulate the TRP73 promoter  
198 (Fig. 3E). Moreover, we did not observe changes in proliferation during development in  
199 *Sox2*<sup>+/-</sup> airways and only a small increase in proliferation in the *Sox21*<sup>-/-</sup> airways (Fig. 3D and  
200 Fig. S2E), showing that SOX2 and SOX21 act mainly on differentiation and not proliferation.  
201 Chromatin immunoprecipitation experiments have characterized SOX2 and SOX21 binding  
202 motifs and we identified putative binding sites for SOX21 in the promoter regions of *Sox2*,

203 *Trp63* and *Trp73* (Matsuda, Kuwako et al. 2012) (Fig. 3E). To better understand the  
204 interaction of SOX2 and SOX21 during the initiation of differentiation towards ciliated cells,  
205 we performed luciferase assays, and show that SOX2 activates its own promoter, as well as  
206 the minimal promoter regions of the *Trp63* and *Trp73* genes (Fig. 3E, S2F). When increasing  
207 amounts of SOX21 were added to SOX2, we observed a significant decrease of luciferase  
208 activity with the *Trp63* promoter, a slight, but non-significant, decrease with the *Sox2*  
209 promoter and no difference with the *Trp73* promoter (Fig. 3E, S2F). This shows that SOX21  
210 can suppress promoter regions of particular genes stimulated by SOX2. On the basis of  
211 these data, we propose that high levels of SOX2 initiate SOX21 expression, leading to a  
212 zone where basal cells start to differentiate. Within this zone, SOX21 promotes the  
213 maintenance of the SOX2+ progenitor state by inhibiting progenitors from differentiating,  
214 while SOX2 stimulates the differentiation of progenitors to basal cells (Fig. 3F).

215

### 216 **Deficiency of SOX2 decreases and SOX21 stimulates airway epithelial repair after** 217 **naphthalene induced injury**

218 Because the balance of SOX2 and SOX21 levels are important in maintaining a progenitor  
219 state during development, we investigated whether SOX21 is also important in the  
220 differentiation and maintenance of adult airway progenitor cells. SOX21 remains expressed  
221 throughout the tracheal epithelium (TE) in both basal and non-basal cells in adult mice (Fig.  
222 4A). Basal cells are adult progenitor cells and are important for regeneration after injury  
223 (Rock, Onaitis et al. 2009). In addition, we observed SOX21 expressing cells in the  
224 submucosal glands (SMGs), which also regenerate the TE after injury (Lynch, Anderson et  
225 al. 2018, Tata, Kobayashi et al. 2018) (Fig. 4A). To test whether the levels of expression of  
226 SOX21 and SOX2 are important to control adult stem cell differentiation, we exposed wild  
227 type (WT), *Sox2*<sup>+/-</sup> and *Sox21*<sup>+/-</sup> mice to cornoil (CO) or naphthalene to induce transient  
228 epithelial injury. We examined the immediate response after 2 days and recovery after 5 and  
229 20 days post-injury (DPI) (Fig. S3A, Fig. 4B). Due to fragility of the *Sox21*<sup>-/-</sup> mice, we were  
230 unable to study adult *Sox21*<sup>-/-</sup> TE after naphthalene injury (Kiso, Tanaka et al. 2009). Neither  
231 *Sox2*<sup>+/-</sup> nor *Sox21*<sup>+/-</sup> TE showed significant differences in the number of basal, dividing basal  
232 and ciliated cells when compared to WT after cornoil exposure (Fig. S3D, E). This suggests  
233 that the observed decreased and increased number of basal cells at E14.5 in *Sox2*<sup>+/-</sup> and  
234 *Sox21*<sup>+/-</sup> airways respectively (Fig. 3), is a transient delay in differentiation that is resolved  
235 after maturation of the lung.

236

237 SOX9+ SMG cells surface at the TE after administering a high dose of naphthalene and  
238 thereby contribute to the repair of the TE. It was shown that at 1 DPI, SOX2 expression is  
239 largely extinguished from the SOX9+ SMG cells, suggesting that changes in expression are



240 important in the early contribution of SMG contribution to repair (Lynch, Anderson et al.  
241 2018). We were unable to detect differences in SOX2 or SOX21 expression at 2 DPI  
242 compared to cornoil exposed mice, suggesting that down-regulation of SOX2 at 1 DPI is  
243 temporary and a consequence of naphthalene administration (Fig. S3B). After five days, we  
244 observed a decrease of SOX9+ cells in *Sox2*<sup>+/-</sup> TE, and a small increase of SOX9+ cells in  
245 *Sox2*<sup>1+/-</sup> TE compared to WT and to each other (Fig. 4C). This shows that the protein levels  
246 of both SOX2 and SOX21 are important for the regeneration of TE via the SOX9+ SMG cells.  
247 The number of ciliated cells and dividing basal cells was unaltered at 5 DPI (Fig. S3C).

248  
249 To determine whether SOX2 or SOX21 deficiency affects regeneration after naphthalene  
250 injury, we quantified the percentage of ciliated, non-dividing and dividing basal cells at 20  
251 DPI. Fewer ciliated cells were observed in *Sox2*<sup>+/-</sup> TE compared to wild type and *Sox2*<sup>1+/-</sup> TE  
252 (Fig. 4D, S3D). Also, *Sox2*<sup>+/-</sup> TE contained more dividing and non-dividing basal cells when  
253 compared to WT TE, or to *Sox2*<sup>+/-</sup> cornoil exposed mice (Fig. 4E, S3D, F). In both WT and  
254 *Sox2*<sup>1+/-</sup> TE there were a similar number of ciliated cells, non-dividing basal cells and dividing  
255 basal cells at 20 DPI compared to cornoil exposed mice (Fig. 4D, Fig. S3D). These results  
256 indicate a recovery of injury in the WT and *Sox2*<sup>1+/-</sup> TE, while *Sox2*<sup>+/-</sup> TE show a delayed  
257 recovery (Fig. 4E, S3D, F).

258

### 259 **SOX2 drives and SOX21 represses basal cell differentiation to ciliated cells**

260 *Sox2*<sup>1+/-</sup> mice did not show increased basal or ciliated cell differentiation 20 days after  
261 naphthalene induced injury, contrary to the phenotype of increased differentiation we  
262 observed during development. To better understand the relation between SOX2 and SOX21  
263 in the regulation of differentiation of basal cells an *in vitro* differentiation air-liquid interface  
264 (ALI) culture method of murine tracheal epithelial cells (MTECs) was applied. ALI-cultures  
265 provide standardized conditions to study basal cell differentiation at several different time  
266 points. Using this model, we show that SOX2 and SOX21 were both expressed at baseline  
267 levels at the start of ALI and their levels gradually increased in the initial days of ALI,  
268 something we were unable to demonstrate *in vivo* (Fig. 5A). Genes corresponding to the  
269 differentiation of ciliated and secretory cells are increased in a similar fashion (Fig. S4A).  
270 Immunofluorescence analysis of SOX2 and SOX21 on ALI day 10 showed expression of  
271 SOX2 and SOX21 in basal and luminal cells, but both proteins seem to have a  
272 heterogeneous distribution between cells (Fig. 5B). To determine whether the levels of SOX2  
273 and SOX21 correlated with each other, we measured the fluorescence intensity of both  
274 proteins (Fig. S4B). Cells expressing SOX2 highly were mostly high in expression of SOX21  
275 and vice versa (Fig. S4B). Basal cells were mainly *Sox2*<sup>low</sup>*Sox21*<sup>low</sup>, while ciliated cells were  
276 either *SOX2*<sup>high</sup>*SOX21*<sup>high</sup> or *SOX2*<sup>high</sup>*SOX21*<sup>low</sup> (Fig. 5C). Within TE *in vivo*, levels of SOX2

277 and SOX21 are similar between cell types (Fig. 4A), suggesting that SOX2 and SOX21  
278 levels are stable for the maintenance of TE epithelium, but when differentiation is initiated  
279 both increase (Fig. 5G).

280

281 To test the importance of the levels of SOX2 and SOX21 in basal cell differentiation, we  
282 isolated MTECs from WT, *Sox2*<sup>+/-</sup> and *Sox21*<sup>+/-</sup> mice. We observed decreased differentiation  
283 to ciliated cells in the *Sox2*<sup>+/-</sup> and increased differentiation from basal to ciliated cells in  
284 *Sox21*<sup>+/-</sup> (Fig. 4D). The differentiation capacity towards secretory cells was not affected in  
285 either *Sox2*<sup>+/-</sup> and *Sox21*<sup>+/-</sup> MTECs when compared to WT (Fig. 4D). Thus, the levels of  
286 SOX2 and SOX21 are mainly involved in balancing the differentiation to ciliated cells, with  
287 SOX2 stimulating differentiation and SOX21 inhibiting differentiation.

288

289 As we observed an increase in TRP73+ cells during airway development in *SOX21*<sup>-/-</sup> mice,  
290 we assessed TRP73 expression in our MTEC cultures. TRP73 is one of the earliest markers  
291 expressed by basal cells upon initiation of ciliated cell differentiation, followed by the loss of  
292 TRP63 expression (Marshall, Mays et al. 2016). After 10 days of ALI there were comparable  
293 numbers of basal cells in *Sox2*<sup>+/-</sup>, *Sox21*<sup>+/-</sup> and WT MTECs (Fig. S4E). While there was an  
294 increase in FOXJ1+ ciliated cells in *Sox21*<sup>+/-</sup>, neither the TRP73+/TRP63+ or  
295 TRP73+/TRP63- populations were affected (Fig. 5E, Fig. S4C). Furthermore, the number of  
296 TRP73+/TRP63+ population was also not affected by decreased levels of SOX2 (Fig. 5E,  
297 Fig. S4C). We did observe a significant decrease of single TRP73 expressing cells in *Sox2*<sup>+/-</sup>  
298 MTECs. As both increasing levels of SOX2 and SOX21 are important to respectively boost  
299 and inhibit differentiation, it seems that both SOX2 and SOX21 act on ciliated cell maturation,  
300 but not on the initial induction of basal cell differentiation by the induction of TRP73 (Fig. 5F).

301

### 302 **SOX2 and SOX21 Expression is Conserved during Human Airway Epithelial Cell**

#### 303 **Differentiation**

304 So far, our data show that SOX21 is an important factor for maintaining a balance  
305 between progenitor maintenance and differentiation in mouse lung development and  
306 regeneration. Next, we asked the question whether this is evolutionary conserved.  
307 Therefore, we cultured human fetal lung tip organoids as described previously (Nikolic,  
308 Caritg et al. 2017). While all cells were positive for SOX2, they co-expressed either SOX9,  
309 SOX21 or both (Fig. 6A). We observed that some of the cells expressing SOX21 were  
310 also positive for the TP63 basal cell marker in the fetal lung organoids (Fig S5A). To see  
311 whether lung progenitor cells expressing SOX21 are more likely to develop into a specific  
312 airway cell type, we differentiated the fetal lung organoids to airway organoids (Fig. S5A).

313 After differentiation, the organoids contained both ciliated and basal cells and SOX21  
314 expression was observed in most cells (Fig. S5A).

315

316 To functionally assess the role of SOX21 in human adult airway epithelium, we isolated  
317 airway epithelial cells from human bronchial epithelium. Both SOX2 and SOX21 are  
318 expressed throughout the bronchial epithelium (Fig. 6B). ALI cultures showed that, similar  
319 to mice, SOX2 and SOX21 were also expressed *in vitro*. After prolonged culturing, a  
320 significant increase of SOX2 and a slight increase of SOX21 was observed (Fig. 6C, Fig.  
321 S5B). Both SOX2 and SOX21 were expressed higher in the luminal fraction when  
322 compared to basal cells (Fig. 6D). Most basal cells were low in SOX2 and SOX21  
323 expression (88.3%), while only a few basal cells were SOX2<sup>low</sup> SOX21<sup>high</sup> (8.3%) and  
324 almost no basal cells were SOX2<sup>high</sup>SOX21<sup>low</sup> or SOX2<sup>high</sup>SOX21<sup>high</sup> (Fig. S5D). Next, we  
325 determined whether the cells on luminal side that were SOX2<sup>high</sup> and/or SOX21<sup>high</sup> were  
326 FOXJ1+ ciliated cells. Comparing FOXJ1+ and FOXJ1- nuclei showed that ciliated cells  
327 were high in SOX2 expression, but SOX21 was highest in non-ciliated cells (Fig. 6D,  
328 S5C). Measurement of the fluorescence intensity of SOX2 and SOX21 showed that most  
329 ciliated cells were SOX2<sup>high</sup>SOX21<sup>low</sup> (75%) (Fig. S5D), while the intensities of either SOX2  
330 or SOX21 for ciliated (FOXJ1+), basal (TP63+) and FOXJ1- P63- cells, revealed that  
331 SOX21 was mainly high in (a subpopulation of) double negative cells (Fig. 6E). We  
332 hypothesize that these cells are intermediate cells transitioning from basal cells to a  
333 luminal cell fate, the para-basal cell. In accordance with this observation, sections of  
334 human airway epithelium, show SOX21<sup>high</sup> cells in between the basal and luminal layer,  
335 which are cells positive for both basal cell marker KRT5 and luminal cell marker KRT8  
336 (Fig. 6B-2,3, arrows). In addition, we compared our results to published single-cell RNA  
337 sequencing data on human primary bronchial epithelial ALI culture (Plasschaert, Zilionis et  
338 al. 2018). This confirmed that high levels of SOX21 mRNA denote an intermediate cell  
339 type. Furthermore, similar to our observation, high levels of SOX2 were observed both in  
340 the intermediate state and in differentiated ciliated cells (Fig. S5E). In conclusion, we  
341 observe high levels of SOX21 in para-basal cells, which have lost TP63 expression and do  
342 not (yet) express FOXJ1. These levels of SOX21 decrease when differentiation continues to  
343 ciliated cells. SOX2 levels are mainly elevated in the maturation of differentiated FOXJ1+  
344 ciliated cells (Fig. 6C). In conclusion, our data suggest that SOX21 is an early determinant  
345 of differentiation of basal to ciliated cells, while SOX2 is important in the maturation of  
346 ciliated cells.

347

348

349 **DISCUSSION**

350 During lung development, a proximal-to-distal epithelial gradient is observed by the  
351 separation of proximal SOX2 and distal SOX9 expressing cells. Here we show a further  
352 regionalization of the proximal epithelium by marking a SOX2+/SOX21+ proximal zone, zone  
353 1. Within this zone, progenitor cells differentiate to basal cells. With the use of human fetal  
354 lung organoids, we confirmed SOX21 expression in SOX2+ progenitor stalk cells (Nikolic,  
355 Caritg et al. 2017). In addition, SOX21 becomes more widely expressed when the organoids  
356 are differentiated to airway organoids. Based on our findings, we propose that  
357 SOX2+SOX21+ expressing progenitor cells in the murine and human fetal lung organoids  
358 are progenitor cells in a zone destined for differentiation and that SOX21 is important in  
359 balancing the maintenance and differentiation of SOX2+ airway progenitor cells.

360  
361 SOX2 has been shown to be a key regulator in regulating proliferation and differentiation in  
362 many different stem cells populations, however the chromatin regions targeted by SOX2 are  
363 cell-type specific. The regulation of stem cells by SOX2 is dependent on its co-factors as well  
364 as on its expression levels (Brafman, Moya et al. 2013, Hagey, Klum et al. 2018). We  
365 observed a correlation between the high expression of SOX2 and appearance of SOX21 at  
366 the dorsal side of the proximal airways and trachea. Additionally, ectopic induction of SOX2  
367 in distal cells resulted in an up-regulation of SOX21. We suggest that SOX2 requires a  
368 certain threshold level of expression to induce SOX21. Interestingly, SOX21 expression was  
369 first observed at embryonic stage (E10.5-11.5), at a time where cells adopt a proximally  
370 restricted fate for the extrapulmonary airways (Yang, Riccio et al. 2018). We suggest that  
371 SOX21 is a downstream effector of SOX2, while the extrapulmonary airways are formed,  
372 separating them from progenitors of the intrapulmonary airways that are only SOX2 positive.  
373 A similar induction of SOX21 by SOX2 has been described in the 4-cell stage embryo,  
374 embryonic stem cells (ESCs) and neuronal progenitor cells. The function of SOX21 and its  
375 synergy or antagonism of SOX2 activity has been shown to be highly context-dependent  
376 (Kopp, Ormsbee et al. 2008, Mallanna, Ormsbee et al. 2010, Chakravarthy, Ormsbee et al.  
377 2011, Goolam, Scialdone et al. 2016). For example, SOX2 maintains the neuronal progenitor  
378 state in the developing nervous system and SOX21 can either stimulate differentiation or  
379 help maintain the progenitor pool depending on external stimuli and expression levels  
380 (Graham, Khudyakov et al. 2003, Ohba, Chiyoda et al. 2004, Sandberg, Kallstrom et al.  
381 2005, Matsuda, Kuwako et al. 2012). Here, we show that SOX9+ distal progenitor cells are  
382 maintained upon ectopic expression of SOX21, and differentiation to SOX2+ progenitor cells  
383 is not initiated. Thus, SOX21 itself is not capable of driving differentiation to SOX2+  
384 progenitor cells in the presence of distal mesenchymal signaling. However, once co-

385 expressed with SOX2, SOX21 expression associates with the region where SOX2 progenitor  
386 cells differentiate to basal cells.

387 Using *Sox21<sup>+/-</sup>* and *Sox21<sup>-/-</sup>* mice, we show that the presence of SOX21 within this zone is  
388 important to suppress the differentiation of SOX2<sup>+</sup> progenitor cells to basal and ciliated cells.  
389 Surprisingly, the number of basal cells is increased upon deletion of SOX21, but also after  
390 ectopic expression of SOX21 using a SPC-promotor. This seemingly contradicting result may  
391 be caused by the artificial induction of SOX21 in SOX9 expressing cells, which does not  
392 induce SOX2. SOX21 may initiate specification of these SOX9<sup>+</sup> cells to a proximal  
393 phenotype, which become even more determined after these SOX9<sup>+</sup> cells exit the influence  
394 of the distal mesenchymal FGF10 signaling. The latter causes the cells to express SOX2,  
395 leading to a more pronounced induction of the proximal fate. The extension of the SOX2<sup>+</sup>  
396 SOX21<sup>+</sup> zone 1 coincides with an induction of TRP63 basal cells, which might also occur in  
397 this SOX21 induced mouse model. The initiation of a proximal cell fate by ectopic expression  
398 of SOX21, followed by SOX2 expression may explain why the cysts observed in the SOX21  
399 expressing lungs are smaller than the cysts observed when SOX2, the major proximal cell  
400 fate inducer, is expressed.

401  
402 SOX21 and SOX2 co-expression continues in adult TE and SMGs, both regions where  
403 progenitor cells reside. We used naphthalene injury and *in vitro* analysis to study whether  
404 SOX21 and SOX2 function are similar in adult progenitors as during development. We show  
405 that reduced SOX2 levels inhibit the contribution of SOX9<sup>+</sup> SMG cells to TE injury, while  
406 reduced SOX21 levels promote their contribution. Furthermore, reduced levels of SOX2  
407 decreased differentiation of basal cells to ciliated cells *in vitro* and *in vivo*, while reduced  
408 levels of SOX21 only increased basal cell differentiation *in vitro* but not *in vivo*. The latter  
409 might be explained the fact that differentiation of progenitor cells *in vivo* is regulated by an  
410 epithelial-mesenchymal interaction, which might inhibit further differentiation to ciliated cells  
411 when regeneration is complete (Volckaert, Yuan et al. 2017). Thus, both during development  
412 and regeneration of the airway epithelium, SOX21 acts as a suppressor of SOX2<sup>+</sup> progenitor  
413 cell differentiation, while SOX2 levels are important for stimulating differentiation. Using a  
414 luciferase assay, we specifically show that SOX21 can antagonize SOX2 function on certain  
415 promotor regions. However, to fully understand the function of SOX21 within SOX2<sup>+</sup> airway  
416 progenitors, signaling/environmental cues, additional co-factors, and expression levels are  
417 likely to play a role.

418  
419 SOX2 and SOX21 showed a similar but not identical expression pattern in human airway  
420 epithelium. As opposed to mouse tracheal epithelium of only a basal and luminal cell layer,  
421 the human proximal airway epithelium contains an additional layer of intermediate cells or

422 para-basal cells (Mercer, Russell et al. 1994, Boers, Ambergen et al. 1998). Using human  
423 primary bronchial epithelial ALI cultures, we show high levels of SOX21 in TP63- FOXJ1-  
424 cells and suggest that these cells represent the intermediate layer of para-basal cells  
425 transitioning to a luminal cell fate. Basal cell hyperplasia of the airway epithelium is an  
426 important disease feature in smokers, COPD and cystic fibrosis (CF) patients (Rock, Randell  
427 et al. 2010). A better understanding on how SOX2 and SOX21 levels control human basal  
428 cell proliferation and differentiation may therefore help to identify therapeutic targets of  
429 airway remodeling within these patients.

430

431 Our data provide a new understanding of proximal-distal patterning of the airways and the  
432 regulation of SOX2 progenitor cells within development and regeneration of airway  
433 epithelium. De-regulation of SOX2 and SOX21 expression levels can alter branching  
434 morphogenesis and differentiation of airway epithelium. We show that SOX21 is a  
435 suppressor of differentiation when SOX2 expression levels are high and when progenitor  
436 cells are prone to differentiate.

437

438

439

## 440 **MATERIALS AND METHODS**

### 441 **Mice**

442 All animal experimental protocols were approved by the animal welfare committee of the  
443 veterinary authorities of the Erasmus Medical Center. Mice were kept under standard  
444 conditions. Mouse strains *SPC-rtTA* (gift of Jeffrey Whitsett), *pTT::myc-SOX2*, *Sox2-CreERT*  
445 (Jackson Labs, stock number 017593) and *SOX21-KO* (gift of Stavros Malas) have been  
446 described (Gontan, de Munck et al. 2008, Kiso, Tanaka et al. 2009, Arnold, Sarkar et al.  
447 2011). A murine *Sox21* cDNA with a N-terminal myc epitope was subcloned in a modified  
448 pTRE-Tight (Clontech) vector (pTT::myc-sox21). Pronuclear microinjection of a linearized  
449 fragment was performed to develop transgenic mice, and three independent lines were  
450 tested. To induce expression of *Sox2* or *Sox21* during lung development, the *pTT::myc-Sox2*  
451 or *pTT::mycSox21* mice were crossed with *SPC-rtTA* mice and doxycycline was  
452 administered to dams in the drinking water (2 mg/ml doxycycline, 5% sucrose) from  
453 gestational day 6.5 onwards. Wild-type animals were C57BL/6.

454

### 455 **Naphthalene Injury**

456 Adult mice (~8-12 weeks) were injured with a single intraperitoneal injection of 300 mg/kg  
457 naphthalene. Naphthalene (Sigma; 184500) was freshly prepared and dissolved in corn oil  
458 (Sigma; C8267). Corn oil injection served as baseline control. Groups of mice were sacrificed  
459 2, 5 and 20 days post injury (DPI) (number of mice per group is indicated in each figure).

460

### 461 **Mouse tracheal epithelial cell culture**

462 Mouse tracheal epithelial cell (MTEC) culture was performed as previously described  
463 (Eenjes, Mertens et al. 2018). Briefly, MTECs were isolated from mice adult trachea and  
464 cultured in KSFM expansion medium (Table 1) on collagen coated plastic (50  $\mu\text{g}/\text{cm}^2$  of rat  
465 tail collagen Type IV (SERVA, 47256.01) in 0.02N acetic acid(Sigma; 537020)). After  
466 expansion,  $8 \times 10^4$  MTECs were plated per collagen coated 12-well insert (Corning Inc,  
467 Corning, USA) in proliferation medium (Table 1) for air-liquid interface (ALI) culture. When  
468 confluent, MTECs were exposed to air by removing proliferation medium and adding MTEC  
469 differentiation medium (Table 1) to the lower chamber. MTECs were cultured in standard  
470 conditions; at 37°C in a humidified incubator with 5% CO<sub>2</sub>.

471

### 472 **Human primary epithelial cell culture**

473 Human primary airway epithelial cell (HPBEC) culture was performed as previously  
474 described (Amatngalim, Schrupf et al. 2018). Lung tissue was obtained from residual,  
475 tumor-free, material obtained at lung resection surgery for lung cancer. The Medical Ethical

476 Committee of the Erasmus MC Rotterdam granted permission for this study (METC 2012-  
477 512).

478

479 Briefly, cells were isolated from healthy bronchial tissue by incubation in 0.15% Protease XIV  
480 (Sigma; P5147) for 2hrs at 37 °C. The inside of the bronchi was scraped in cold PBS (Sigma;  
481 D8537) and the obtained airway cells were centrifuged and resuspended in KSFM-HPBEC  
482 medium for expansion (table 1). Culture plates were coated with 10 µg/mL human fibronectin  
483 (Millipore; FC010), 30 µg/mL BSA (Roche; 1073508600) and 10 µg/mL PureCol (Advanced  
484 Biomatrix; 5005-B) for 2 hrs at 37°C. Upon confluency, HPBECs were frozen ( $4 \times 10^5$  cells /  
485 vial) and stored for later use.

486

487 When used for ALI culture, cells were thawed and seeded in a coated 10cm-dish, grown until  
488 confluent in KSFM-HPBEC medium, trypsinized and  $8 \times 10^4$  of HPBECs were plated per 12-  
489 transwell insert (Corning Inc, Corning, USA). On inserts, the HPBECs were cultured in  
490 bronchial epithelial growth medium (ScienCell Research Laboratories, Carlsbad, USA; 3211).  
491 Basal bronchial epithelial growth medium was first diluted 1:1 with DMEM (Gibco; 41966).  
492 Next, 1x supplement and 1x pen/strep (Lonza; DE17-602e) was added to 500 mL (BEGM).  
493 Retinoic acid (1 nM, RA) was freshly added. When cells reached full confluency, the BEGM  
494 medium was removed from the apical chamber and only supplied to the basal chamber and  
495 freshly supplemented with 50 nM RA. The medium was changed every other day and the  
496 apical chamber was rinsed with PBS. HPBECs were cultured in standard conditions; at 37°C  
497 in a humidified incubator with 5% CO<sub>2</sub>.

498

#### 499 **Human fetal organoid culture**

500 The culture of human fetal lung (17 weeks of gestation) and adult airway organoids was  
501 performed as previously described (Nikolic, Caritg et al. 2017, Miller, Hill et al. 2018).

502 Lung lobes were dissociated using dispase (Corning; 354235) on ice for 30 minutes. Tissue  
503 pieces were then incubated in 100% FBS on ice for 15 minutes, after which they were  
504 transferred to a 10% FBS solution in Advanced DMEM with Glutamax, P/S and Hepes. Lung  
505 bud tips were separated from mesenchymal cells through repeated pipetting. Pieces of tissue  
506 were resuspended in 30 µl of basal membrane extract (BME type 2, Trevigon; 3533-010-02),  
507 transferred to a 48-well plate and incubated at 37°C to solidify the BME. After 5 min, 300 µl of  
508 self-renewing fetal lung organoid medium (table 1) was added (Nikolic, Caritg et al. 2017).  
509 Medium was refreshed every 3-4 days. Every 2 weeks, organoids were split 1:3 to 1:6. The  
510 medium was aspirated and cold PBS was added to the well to re-solidify the BME. Organoids  
511 were disrupted using a 1000 µl tip with on top a 2 µl tip. The disrupted organoids were  
512 centrifuged at 300 g for 5 min, resuspended in BME and re-plated. To differentiate to airway



513 epithelium, fetal lung organoids were split, resuspended in BME and replated. To initiate  
514 differentiation of fetal lung organoids to airway organoids, human adult organoids medium  
515 was added after splitting. Organoids were grown under standard culture conditions (37 °C,  
516 5% CO<sub>2</sub>).

517

## 518 **Immunofluorescence**

### 519 *Tissue*

520 Mouse embryonic lungs and human bronchial tissue were fixed overnight in 4% PFA (Sigma;  
521 441244) at 4 °C. Post-fixation, samples were washed with PBS, de-hydrated to 100%  
522 ethanol, transferred to xylene and processed to paraffin wax for embedding.

523 Organoids were retrieved from the BME by adding cold PBS to the 48 well. Organoids were  
524 centrifuged at 150g for 5 min and fixed overnight in 4% PFA at 4 °C. Post-fixation, organoids  
525 sink to the bottom of the tube. Centrifuging was avoided after fixation to keep the organoids  
526 intact. The organoids were embedded in 4% low-melting agarose. The organoids were  
527 washed in PBS for 30 min and manually de-hydrated by 50 min incubation steps in 50%,  
528 70%, 85%, 95% and 2 times 100% ethanol. Organoids were further processed by 3 times  
529 xylene for 20- 30 min, washed 3 times for 20-30 min in 60 °C warm paraffin to remove all  
530 traces of xylene. The organoids were placed in a mold and embedded in paraffin. Paraffin  
531 blocks were sectioned at 5 µm and dried overnight at 37 °C.

532

533 Sections were deparaffinized by 3 times 3 min xylene washes, followed by rehydration in  
534 distilled water. Antigen retrieval was performed by boiling the slides in Tris-EDTA (10M Tris,  
535 1M EDTA) buffer pH=9.0 for 15 min. Slides were cooled down for 30 min and transferred to  
536 PBS. For SOX21 staining, the Tyramide Signal Amplification (TSA) kit was used (Invitrogen,  
537 B40922, according to manufacturer's protocol). When using the TSA kit, a hydrogen peroxide  
538 (35%) blocking step was performed after boiling. Sections were blocked for 1 hr at room  
539 temperature (RT) in 3% BSA (Roche; 10735086001), 0.05% Tween (Sigma; P1379) in PBS.  
540 Primary antibodies (table 2) were diluted in blocking buffer and incubated with the sections  
541 overnight at 4 °C. The next day, sections were washed 3 times for 5 min at room temperature  
542 (RT) in PBS with 0.05% Tween. Secondary antibodies (table 2) were added in blocking  
543 buffer and incubated for 2 hrs at RT. DAPI (4',6-Diamidino-2-Phenylindole) solution (BD  
544 Pharmingen, 564907, 1:4000) was added to the secondary antibodies for nuclear staining.  
545 After incubation, 3 times 5 min washes in PBS-0.05% Tween and one wash in PBS was  
546 performed, sections were mounted using Mowiol reagent (For 100 mL: 2,4% m/v Mowiol  
547 (Sigma; 81381), 4,75% m/v glycerol, 12 % v/v Tris 0.2M pH=8.5 in dH<sub>2</sub>O till 100 mL). All  
548 sections were imaged on a Leica SP5 confocal microscope.

549

550 *Air-liquid interface culture*

551 Human or mouse ALI cultures were washed with PBS and fixed on inserts in 4% PFA at RT  
552 for 15 min. Inserts were then washed 3 times for 5 min in 0.3% TritonX (Sigma; T8787) in  
553 PBS and blocked for 1 hr at RT in 5% normal donkey serum (NDS, Millipore; S30), 1% BSA  
554 0.3% TritonX in PBS. Primary antibodies (table 2) were diluted in blocking buffer and  
555 incubated overnight at 4 °C. The next day, inserts were 3 times rinsed with 0.03% TritonX in  
556 PBS followed by 3 washes for 10 min at RT in PBS with 0.03% TritonX. Secondary  
557 antibodies (table 2) were added in blocking buffer and incubated for 2 hrs at RT. DAPI  
558 solution (BD Pharmingen, 564907, 1:2000) was added to the secondary antibodies as well.  
559 After incubation, inserts were 3 times rinsed with 0.03% TritonX in PBS followed by 3 washes  
560 for 10 min at RT. Inserts were covered by a coverslip using Miowol reagent. Images were  
561 collated on a Leica SP5 confocal microscope.

562

563 **Image analysis**

564 *Fluorescence intensity measurements*

565 Intensity measurements in MTEC and HPBEC cultures were performed on 3 separate  
566 isolations from wild-type mice or donors and measured using ImageJ. Of each n, more than  
567 500 nuclei were manually selected on the DAPI staining. In each nucleus, the intensity of  
568 SOX2 and SOX21 was measured. The MFI for each n and each intensity measurement was  
569 calculated by dividing it by the average intensity of that measurement in the same n.

570

571 *Counting*

572 To standardized counting between animals, basal and ciliated cells were counted during lung  
573 development in a square of 400  $\mu\text{m}$  around the first branch at the medial side of the bronchi.  
574 In this way, we could determine a position in the *SOX21*<sup>-/-</sup> animal where in the wildtype  
575 *SOX21* is highest expressed. Of each genotype and each n, 3 sections were counted and  
576 the percentage of ciliated and basal cells were calculated based on the total number of  
577 airway epithelial (*SOX2*<sup>+</sup>) cells.

578 Five days' after Naphthalene injury, the number of basal (*TRP63*<sup>+</sup>), ciliated (*FOXJ1*<sup>+</sup>),  
579 dividing (*KI67*<sup>+</sup>) and *SOX9*<sup>+</sup> cells were counted in the tracheal epithelium from cartilage ring  
580 (C) 0 till C1. Twenty days' post injury, basal, ciliated and dividing cells were counted from C0  
581 till C6. Of each animal 3 sections were counted throughout the trachea.

582 Of the MTEC culture, the number of *FOXJ1*<sup>+</sup> nuclei were counted per 775  $\mu\text{m}^2$ . For  
583 determining, the differentiation to cilia and secretory cells, the percentage of *TUBIV*<sup>+</sup> and  
584 *SCGB3A1*<sup>+</sup> area per 775  $\mu\text{m}^2$  was measured. The number of *TRP63*<sup>+</sup> basal and *TRP73*<sup>+</sup>  
585 cells were counted respectively to the number of nuclei present in each field. Each n are  
586 separate isolations of different animal, and per n, 5 fields of 775  $\mu\text{m}^2$  were counted.

587

## 588 **RNA isolation, cDNA synthesis and qRT-PCR analysis**

589 Human or mouse airway cells were removed from the insert by scraping them off the insert  
590 into cold PBS. Cells were collected in an Eppendorf tube and centrifuged at 800g for 5 min at  
591 4 °C. PBS was aspirated and the cell pellet was snap frozen in liquid nitrogen and stored at -  
592 80 °C till RNA isolation.

593

594 To isolate RNA, 500 µl of TRI Reagent® (Sigma, T9424) was added to the cell pellet. RNA  
595 extraction was performed according to the TRI Reagent® protocol. RNA concentrations  
596 were measured using NanoDrop (ThermoFisher Scientific). First strand cDNA synthesis was  
597 synthesized using 2 µg RNA, MLV Reverse transcriptase (Sigma, M1302) and Oligo-dT  
598 primers (self-designed: 23xT+A, 23xT+C and 23xT+G). For one qRT-PCR reaction, 0.5 µl of  
599 cDNA was used with Platinum Taq polymerase (Invitrogen, 18038042) and SybrGreen  
600 (Sigma, S9430). The primer combinations for the qRT-PCR are listed in table 3. Normalized  
601 gene expression was calculated using the ddCT method relative to GAPDH (mouse) or B-  
602 ACTIN (human) control.

603

## 604 **Luciferase Assay**

### 605 *Cloning*

606 Promotor regions were PCR-amplified (primers listed in table 4) from mouse genomic DNA.  
607 To each primer, a restriction site was added, to clone the promotor region into the pGL4.10  
608 [luc2] construct (Promega; E6651). The promotor sequence included the sequence of a  
609 transcriptional active area, which was identified with a RNA polymerase II ChIP in mouse  
610 tracheal epithelial cells (Marshall, Mays et al. 2016). We used *in silico* analysis to predict  
611 SOX21 binding sites (MatInceptor, GenomatixSuite v3.10 and  
612 <http://jaspar2016.genereg.net/>).

613

### 614 *Luciferase Assay*

615 HELA cells were plated in a 12-well plate in DMEM + 10%FCS and transiently transfected  
616 using Lipofectamine3000 (Thermofisher, L3000001). Each transfection consisted of 250 ng  
617 expression plasmid (pcDNA3-control (Addgene; n/a), pcDNA3-Sox2FLAG (homemad),  
618 pcDNA3-Sox21MYC (homemad)), 250 ng pGL4.10[luc2] reporter plasmid and 2.5 ng TK-  
619 Renilla plasmid (Promega; E2241) (transfection control). Luciferase activity was measured  
620 48 hrs after transfection using the Dual-Luciferase® Reporter Assay System (Promega,  
621 E1910). Plate reader VICTOR™ X4 was used to measure Firefly and Renilla luminescence.  
622 Firefly luminescence of each sample was calculated by dividing the Firefly luminiscence by  
623 the Renilla luminescence. The increase or decrease of luciferase activity was then

624 normalized to the pGL4.10[luc2] reporter plasmid transfected with the pcDNA3-control  
625 expression plasmid.

#### 626 *Western blot*

627 Samples were prepared from cell lysates used for luciferase measurements. Cells were  
628 lysed in the lysis buffer that was included in the Dual-Luciferase® Reporter Assay System  
629 (Promega, E1910). To the cell lysate, 8M urea (to denature the DNA), 50mM 1,4-  
630 dithiothreitol (DTT, Sigma) and 1x SDS Sample buffer was added. Samples were boiled and  
631 loaded on a 12% SDS-polyacrylamide gel and blotted onto a PVDF membrane (Immobilon®-  
632 P transfer membrane, Millipore). The blots were blocked for 1 h in PBS containing 0.05%  
633 Tween-20 and 3% BSA at room temperature, and probed overnight with primary antibodies  
634 at 4 °C (Table 2). Next day, membranes were washed three times with PBS containing  
635 0.05% Tween-20 and incubated for 1 h with horseradish peroxidase (HRP)-conjugated  
636 secondary antibodies (DAKO) at a dilution of 1:10,000. Signal was detected with  
637 Amersham™ ECL™ Prime Western Blotting Detection Reagent (GE Healthcare). Blots were  
638 developed using the Amersham Imager 600GE (GE Healthcare).

639

#### 640 **Statistics**

641 Statistical analysis was performed using Prism5 (Graphpad). For all measurement, three or  
642 more biological replicates were used. Data are represented as means ± standard error of  
643 mean (SEM) with the data points present in each graph. Statistical differences between  
644 samples were assed with Student unpaired t-test, one-way ANOVA (post-test: Tukey) or two-  
645 way ANOVA (post-test: Bonferroni). P-values below 0.05 are considered significant. The  
646 number of replicates and statistical tests used are indicated in the figure legends.

647

#### 648 **Single Cell RNA sequencing of HPBEC**

649 Expression levels of *SOX2* and *SOX21* in ALI cultures of HPBEC were analyzed using the  
650 dataset previously published (Plasschaert, Zilionis et al. 2018). The data set was available on  
651 the following link:

652 [https://kleintools.hms.harvard.edu/tools/springViewer\\_1\\_6\\_dev.html?datasets/reference\\_HB](https://kleintools.hms.harvard.edu/tools/springViewer_1_6_dev.html?datasets/reference_HB)  
653 [ECs/reference\\_HBECs](#)

654

655

656 **ACKNOWLEDGEMENT**

657 We thank, Mart Lamers and Bart Haagmans (Department of Viroscience, Erasmus MC) for  
658 assistance and supplying the human fetal lung organoids, Thomas Koudstaal (department of  
659 Pulmonary Medicine, Erasmus MC) for supplying lung resection material for the isolation of  
660 human primary bronchial epithelial cells, and Frank Grosveld for critically reading the  
661 manuscript (Department of Cell Biology, Erasmus MC). This work was supported by a grant  
662 from the Sophia Foundation for Medical Research (grant number S14-12).

663

664 **AUTHOR CONTRIBUTIONS**

665 E.E. designed, performed, analyzed the experiments and wrote the paper. M.V.B.K, A.D.M  
666 and L.B.K performed the experiments and reviewed the manuscript. J.M.S reviewed the  
667 manuscript. D.T. funding acquisition and reviewed the paper. J.J.P. wrote, reviewed and  
668 edited the paper. R.J.R. supervision, funding acquisition, experimental design and wrote the  
669 paper.

670

671 **DECLARATION OF INTEREST**

672 The authors declare no competing interests

673

674

675

676 **REFERENCES**

- 677 Amatngalim, G. D., J. A. Schrupf, F. Dishchekian, T. C. J. Mertens, D. K. Ninaber, A. C. van der  
678 Linden, C. Pilette, C. Taube, P. S. Hiemstra and A. M. van der Does (2018). "Aberrant epithelial  
679 differentiation by cigarette smoke dysregulates respiratory host defence." Eur Respir J **51**(4).
- 680 Arnold, K., A. Sarkar, M. A. Yram, J. M. Polo, R. Bronson, S. Sengupta, M. Seandel, N. Geijsen and K.  
681 Hochedlinger (2011). "Sox2(+) adult stem and progenitor cells are important for tissue regeneration  
682 and survival of mice." Cell Stem Cell **9**(4): 317-329.
- 683 Boers, J. E., A. W. Ambergen and F. B. Thunnissen (1998). "Number and proliferation of basal and  
684 parabasal cells in normal human airway epithelium." Am J Respir Crit Care Med **157**(6 Pt 1): 2000-  
685 2006.
- 686 Brafman, D. A., N. Moya, S. Allen-Soltero, T. Fellner, M. Robinson, Z. L. McMillen, T. Gaasterland and  
687 K. Willert (2013). "Analysis of SOX2-expressing cell populations derived from human pluripotent stem  
688 cells." Stem Cell Reports **1**(5): 464-478.
- 689 Chakravarthy, H., B. D. Ormsbee, S. K. Mallanna and A. Rizzino (2011). "Rapid activation of the  
690 bivalent gene Sox21 requires displacement of multiple layers of gene-silencing machinery." FASEB J  
691 **25**(1): 206-218.
- 692 Eenjes, E., T. C. J. Mertens, M. J. Buscop-van Kempen, Y. van Wijck, C. Taube, R. J. Rottier and P.  
693 S. Hiemstra (2018). "A novel method for expansion and differentiation of mouse tracheal epithelial  
694 cells in culture." Sci Rep **8**(1): 7349.
- 695 Freeman, S. D. and N. Daudet (2012). "Artificial induction of Sox21 regulates sensory cell formation in  
696 the embryonic chicken inner ear." PLoS One **7**(10): e46387.
- 697 Gontan, C., A. de Munck, M. Vermeij, F. Grosveld, D. Tibboel and R. Rottier (2008). "Sox2 is  
698 important for two crucial processes in lung development: branching morphogenesis and epithelial cell  
699 differentiation." Dev Biol **317**(1): 296-309.
- 700 Goolam, M., A. Scialdone, S. J. L. Graham, I. C. Macaulay, A. Jedrusik, A. Hupalowska, T. Voet, J. C.  
701 Marioni and M. Zernicka-Goetz (2016). "Heterogeneity in Oct4 and Sox2 Targets Biases Cell Fate in  
702 4-Cell Mouse Embryos." Cell **165**(1): 61-74.
- 703 Graham, V., J. Khudyakov, P. Ellis and L. Pevny (2003). "SOX2 functions to maintain neural  
704 progenitor identity." Neuron **39**(5): 749-765.
- 705 Hagey, D. W., S. Klum, I. Kurtzdotter, C. Zaouter, D. Topcic, O. Andersson, M. Bergsland and J. Muhr  
706 (2018). "SOX2 regulates common and specific stem cell features in the CNS and endoderm derived  
707 organs." PLoS Genet **14**(2): e1007224.
- 708 Hines, E. A., M. K. Jones, J. M. Verheyden, J. F. Harvey and X. Sun (2013). "Establishment of smooth  
709 muscle and cartilage juxtaposition in the developing mouse upper airways." Proc Natl Acad Sci U S A  
710 **110**(48): 19444-19449.
- 711 Kiso, M., S. Tanaka, R. Saba, S. Matsuda, A. Shimizu, M. Ohyama, H. J. Okano, T. Shiroishi, H.  
712 Okano and Y. Saga (2009). "The disruption of Sox21-mediated hair shaft cuticle differentiation causes  
713 cyclic alopecia in mice." Proc Natl Acad Sci U S A **106**(23): 9292-9297.
- 714 Kopp, J. L., B. D. Ormsbee, M. Desler and A. Rizzino (2008). "Small increases in the level of Sox2  
715 trigger the differentiation of mouse embryonic stem cells." Stem Cells **26**(4): 903-911.

716 Lynch, T. J., P. J. Anderson, P. G. Rotti, S. R. Tyler, A. K. Crooke, S. H. Choi, D. T. Montoro, C. L.  
717 Silverman, W. Shahin, R. Zhao, C. W. Jensen-Cody, A. Adamcakova-Dodd, T. I. A. Evans, W. Xie, Y.  
718 Zhang, H. Mou, B. P. Herring, P. S. Thorne, J. Rajagopal, C. Yeaman, K. R. Parekh and J. F.  
719 Engelhardt (2018). "Submucosal Gland Myoepithelial Cells Are Reserve Stem Cells That Can  
720 Regenerate Mouse Tracheal Epithelium." Cell Stem Cell **22**(5): 779.

721 Mahoney, J. E., M. Mori, A. D. Szymaniak, X. Varelas and W. V. Cardoso (2014). "The hippo pathway  
722 effector Yap controls patterning and differentiation of airway epithelial progenitors." Dev Cell **30**(2):  
723 137-150.

724 Mallanna, S. K., B. D. Ormsbee, M. Iacovino, J. M. Gilmore, J. L. Cox, M. Kyba, M. P. Washburn and  
725 A. Rizzino (2010). "Proteomic analysis of Sox2-associated proteins during early stages of mouse  
726 embryonic stem cell differentiation identifies Sox21 as a novel regulator of stem cell fate." Stem Cells  
727 **28**(10): 1715-1727.

728 Marshall, C. B., D. J. Mays, J. S. Beeler, J. M. Rosenbluth, K. L. Boyd, G. L. Santos Guasch, T. M.  
729 Shaver, L. J. Tang, Q. Liu, Y. Shyr, B. J. Venters, M. A. Magnuson and J. A. Pietsenpol (2016). "p73 Is  
730 Required for Multiciliogenesis and Regulates the Foxj1-Associated Gene Network." Cell Rep **14**(10):  
731 2289-2300.

732 Matsuda, S., K. Kuwako, H. J. Okano, S. Tsutsumi, H. Aburatani, Y. Saga, Y. Matsuzaki, A. Akaike, H.  
733 Sugimoto and H. Okano (2012). "Sox21 promotes hippocampal adult neurogenesis via the  
734 transcriptional repression of the Hes5 gene." J Neurosci **32**(36): 12543-12557.

735 Mercer, R. R., M. L. Russell, V. L. Roggli and J. D. Crapo (1994). "Cell number and distribution in  
736 human and rat airways." Am J Respir Cell Mol Biol **10**(6): 613-624.

737 Metzger, R. J., O. D. Klein, G. R. Martin and M. A. Krasnow (2008). "The branching programme of  
738 mouse lung development." Nature **453**(7196): 745-750.

739 Miller, A. J., D. R. Hill, M. S. Nagy, Y. Aoki, B. R. Dye, A. M. Chin, S. Huang, F. Zhu, E. S. White, V.  
740 Lama and J. R. Spence (2018). "In Vitro Induction and In Vivo Engraftment of Lung Bud Tip Progenitor  
741 Cells Derived from Human Pluripotent Stem Cells." Stem Cell Reports **10**(1): 101-119.

742 Mori, M., J. E. Mahoney, M. R. Stupnikov, J. R. Paez-Cortez, A. D. Szymaniak, X. Varelas, D. B.  
743 Herrick, J. Schwob, H. Zhang and W. V. Cardoso (2015). "Notch3-Jagged signaling controls the pool  
744 of undifferentiated airway progenitors." Development **142**(2): 258-267.

745 Nikolic, M. Z., O. Caritg, Q. Jeng, J. A. Johnson, D. Sun, K. J. Howell, J. L. Brady, U. Laresgoiti, G.  
746 Allen, R. Butler, M. Zilbauer, A. Giangreco and E. L. Rawlins (2017). "Human embryonic lung epithelial  
747 tips are multipotent progenitors that can be expanded in vitro as long-term self-renewing organoids."  
748 Elife **6**.

749 Ochieng, J. K., K. Schilders, H. Kool, A. Boerema-De Munck, M. Buscop-Van Kempen, C. Gontan, R.  
750 Smits, F. G. Grosveld, R. M. Wijnen, D. Tibboel and R. J. Rottier (2014). "Sox2 regulates the  
751 emergence of lung basal cells by directly activating the transcription of Trp63." Am J Respir Cell Mol  
752 Biol **51**(2): 311-322.

753 Ohba, H., T. Chiyoda, E. Endo, M. Yano, Y. Hayakawa, M. Sakaguchi, R. B. Darnell, H. J. Okano and  
754 H. Okano (2004). "Sox21 is a repressor of neuronal differentiation and is antagonized by YB-1."  
755 Neurosci Lett **358**(3): 157-160.

756 Park, W. Y., B. Miranda, D. Lebeche, G. Hashimoto and W. V. Cardoso (1998). "FGF-10 is a  
757 chemotactic factor for distal epithelial buds during lung development." *Dev Biol* **201**(2): 125-134.

758 Plasschaert, L. W., R. Zilionis, R. Choo-Wing, V. Savova, J. Knehr, G. Roma, A. M. Klein and A. B.  
759 Jaffe (2018). "A single-cell atlas of the airway epithelium reveals the CFTR-rich pulmonary ionocyte."  
760 *Nature* **560**(7718): 377-381.

761 Que, J., X. Luo, R. J. Schwartz and B. L. Hogan (2009). "Multiple roles for Sox2 in the developing and  
762 adult mouse trachea." *Development* **136**(11): 1899-1907.

763 Que, J., T. Okubo, J. R. Goldenring, K. T. Nam, R. Kurotani, E. E. Morrisey, O. Taranova, L. H. Pevny  
764 and B. L. Hogan (2007). "Multiple dose-dependent roles for Sox2 in the patterning and differentiation  
765 of anterior foregut endoderm." *Development* **134**(13): 2521-2531.

766 Rawlins, E. L., C. P. Clark, Y. Xue and B. L. Hogan (2009). "The Id2+ distal tip lung epithelium  
767 contains individual multipotent embryonic progenitor cells." *Development* **136**(22): 3741-3745.

768 Rock, J. R., M. W. Onaitis, E. L. Rawlins, Y. Lu, C. P. Clark, Y. Xue, S. H. Randell and B. L. Hogan  
769 (2009). "Basal cells as stem cells of the mouse trachea and human airway epithelium." *Proc Natl Acad*  
770 *Sci U S A* **106**(31): 12771-12775.

771 Rock, J. R., S. H. Randell and B. L. Hogan (2010). "Airway basal stem cells: a perspective on their  
772 roles in epithelial homeostasis and remodeling." *Dis Model Mech* **3**(9-10): 545-556.

773 Sandberg, M., M. Kallstrom and J. Muhr (2005). "Sox21 promotes the progression of vertebrate  
774 neurogenesis." *Nat Neurosci* **8**(8): 995-1001.

775 Tata, A., Y. Kobayashi, R. D. Chow, J. Tran, A. Desai, A. J. Massri, T. J. McCord, M. D. Gunn and P.  
776 R. Tata (2018). "Myoepithelial Cells of Submucosal Glands Can Function as Reserve Stem Cells to  
777 Regenerate Airways after Injury." *Cell Stem Cell* **22**(5): 668-683 e666.

778 Tompkins, D. H., V. Besnard, A. W. Lange, S. E. Wert, A. R. Keiser, A. N. Smith, R. Lang and J. A.  
779 Whitsett (2009). "Sox2 is required for maintenance and differentiation of bronchiolar Clara, ciliated,  
780 and goblet cells." *PLoS One* **4**(12): e8248.

781 Volckaert, T., T. Yuan, C. M. Chao, H. Bell, A. Sitaula, L. Szimtenings, E. El Agha, D. Chanda, S.  
782 Majka, S. Bellusci, V. J. Thannickal, R. Fassler and S. P. De Langhe (2017). "Fgf10-Hippo Epithelial-  
783 Mesenchymal Crosstalk Maintains and Recruits Lung Basal Stem Cells." *Dev Cell* **43**(1): 48-59 e45.

784 Wang, Y., Y. Tian, M. P. Morley, M. M. Lu, F. J. Demayo, E. N. Olson and E. E. Morrisey (2013).  
785 "Development and regeneration of Sox2+ endoderm progenitors are regulated by a Hdac1/2-  
786 Bmp4/Rb1 regulatory pathway." *Dev Cell* **24**(4): 345-358.

787 Weaver, M., J. M. Yingling, N. R. Dunn, S. Bellusci and B. L. Hogan (1999). "Bmp signaling regulates  
788 proximal-distal differentiation of endoderm in mouse lung development." *Development* **126**(18): 4005-  
789 4015.

790 Whittington, N., D. Cunningham, T. K. Le, D. De Maria and E. M. Silva (2015). "Sox21 regulates the  
791 progression of neuronal differentiation in a dose-dependent manner." *Dev Biol* **397**(2): 237-247.

792 Yang, Y., P. Riccio, M. Schotsaert, M. Mori, J. Lu, D. K. Lee, A. Garcia-Sastre, J. Xu and W. V.  
793 Cardoso (2018). "Spatial-Temporal Lineage Restrictions of Embryonic p63(+) Progenitors Establish  
794 Distinct Stem Cell Pools in Adult Airways." *Dev Cell* **44**(6): 752-761 e754.

795



796 FIGURES AND LEGENDS

Figure 1

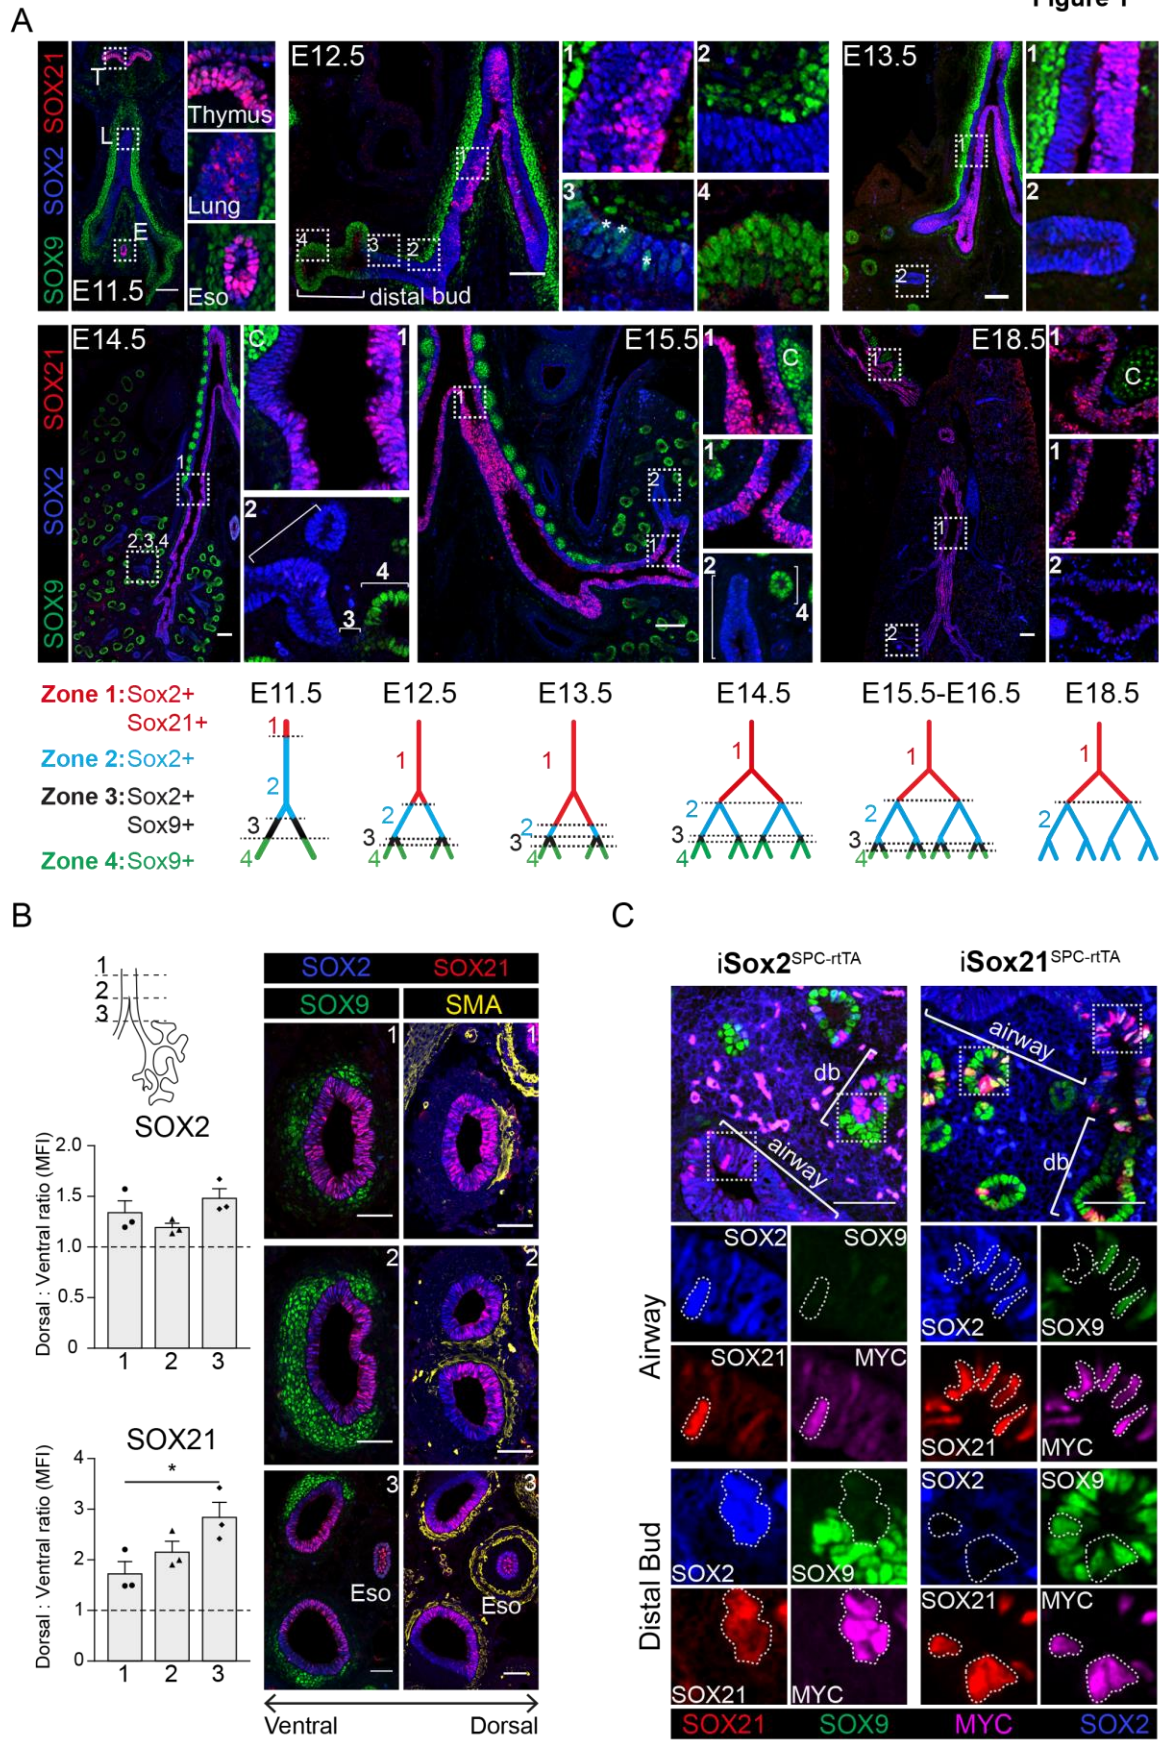

797

798 **Figure 1. SOX21 is expressed in the airway epithelium and is confined to the proximal**  
799 **region of the SOX2 non-branching zone.**

800 (A) Co-staining of SOX9 (green) for distal buds, SOX2 (blue) for proximal epithelium and  
801 SOX21 (red) at different stages of lung development. Schematic representations show the  
802 distribution of SOX9, SOX2 and SOX21 in the different identified zones in the branching  
803 airways during gestation. At E12.5 the asterisks indicate the cells in zone 3 expressing both  
804 SOX2 and SOX9. T = thymus, L = Lung and E = Esophagus. C = Cartilage. Scale bar = 50  
805  $\mu\text{m}$ .

806 (B) Transversal sections at three different locations of an E14.5 trachea and main bronchi  
807 stained with SOX2 (blue), SOX9 (green), SOX21 (red) and SMA (yellow). Location 1 =  
808 trachea, 2 = around the carina and 3 = immediately distal of the carina. SOX9+  
809 mesenchymal cells surround the ventral side of the trachea and bronchi and SMA+ cells  
810 surround the dorsal side. The graphs show the ratio of mean fluorescence intensity (MFI)  
811 between ventral and dorsal of SOX2 and SOX21 at the three different locations. Scale bar =  
812 50  $\mu\text{m}$ . Eso = esophagus.

813 (C) E15 Lung sections of doxycycline induced  $iSox2^{\text{SPC-rtTA}}$  and  $iSox21^{\text{SPC-rtTA}}$ . Expression of  
814 transgenic *Myc*-tagged *Sox2* or *Sox21* was induced by giving doxycycline from E6 onwards.  
815 Sections are stained with SOX2 (blue), SOX9 (green), SOX21 (red) and MYC (purple). Scale  
816 bar = 50  $\mu\text{m}$ . Db = distal bud.

817  
818

Figure 2

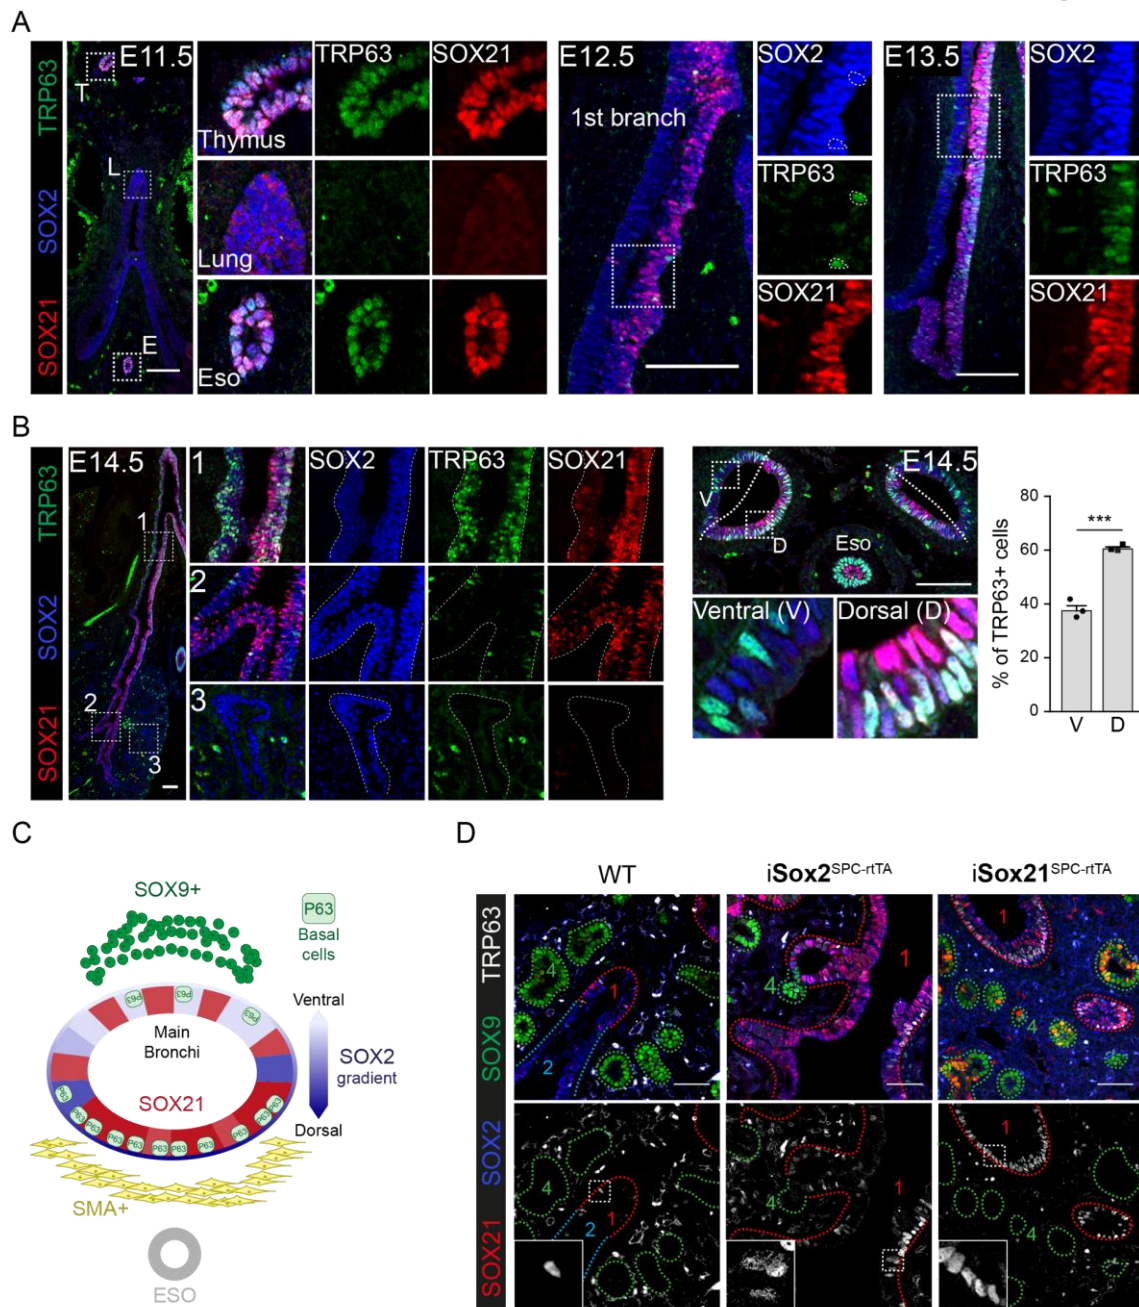

819

820

821 **Figure 2 SOX2 and SOX21 are co-expressed in the zone where differentiation of**  
 822 **progenitor cells to basal cells takes place**

823 (A) Immunofluorescence of SOX2 (blue), SOX21 (red) and TRP63 (green) on lung sections  
 824 of embryonic ages (E) 11.5, 12.5 and 13.5 showing a gradual co-localization of the three  
 825 proteins. Scale bar = 100  $\mu$ m.

826 (B) Immunofluorescence of SOX2 (blue), SOX21 (red) and TRP63 (green) on longitudinal  
 827 lung sections and transversal sections the main bronchi on embryonic ages (E) 14.5. The

828 graph shows the percentage of basal cells in the ventral versus dorsal side of the bronchi. T-  
829 test (n=3; \*p<0.05, \*\*\* p<0.001). V = ventral, and D = dorsal. Scale bar = 100  $\mu$ m.  
830 (C) Schematic representation of SOX2, SOX21 expression and basal cell differentiation in a  
831 transverse section of a main bronchi.  
832 (D) E15 Lung sections of doxycycline induced (E6 until E15) iSox2<sup>SPC-rtTA</sup> and iSox21<sup>SPC-rtTA</sup>  
833 mice. Sections are stained with SOX2 (blue), SOX9 (green), SOX21 (red) and TRP63 (grey).  
834 Scale bar = 100  $\mu$ m.  
835  
836

Figure 3

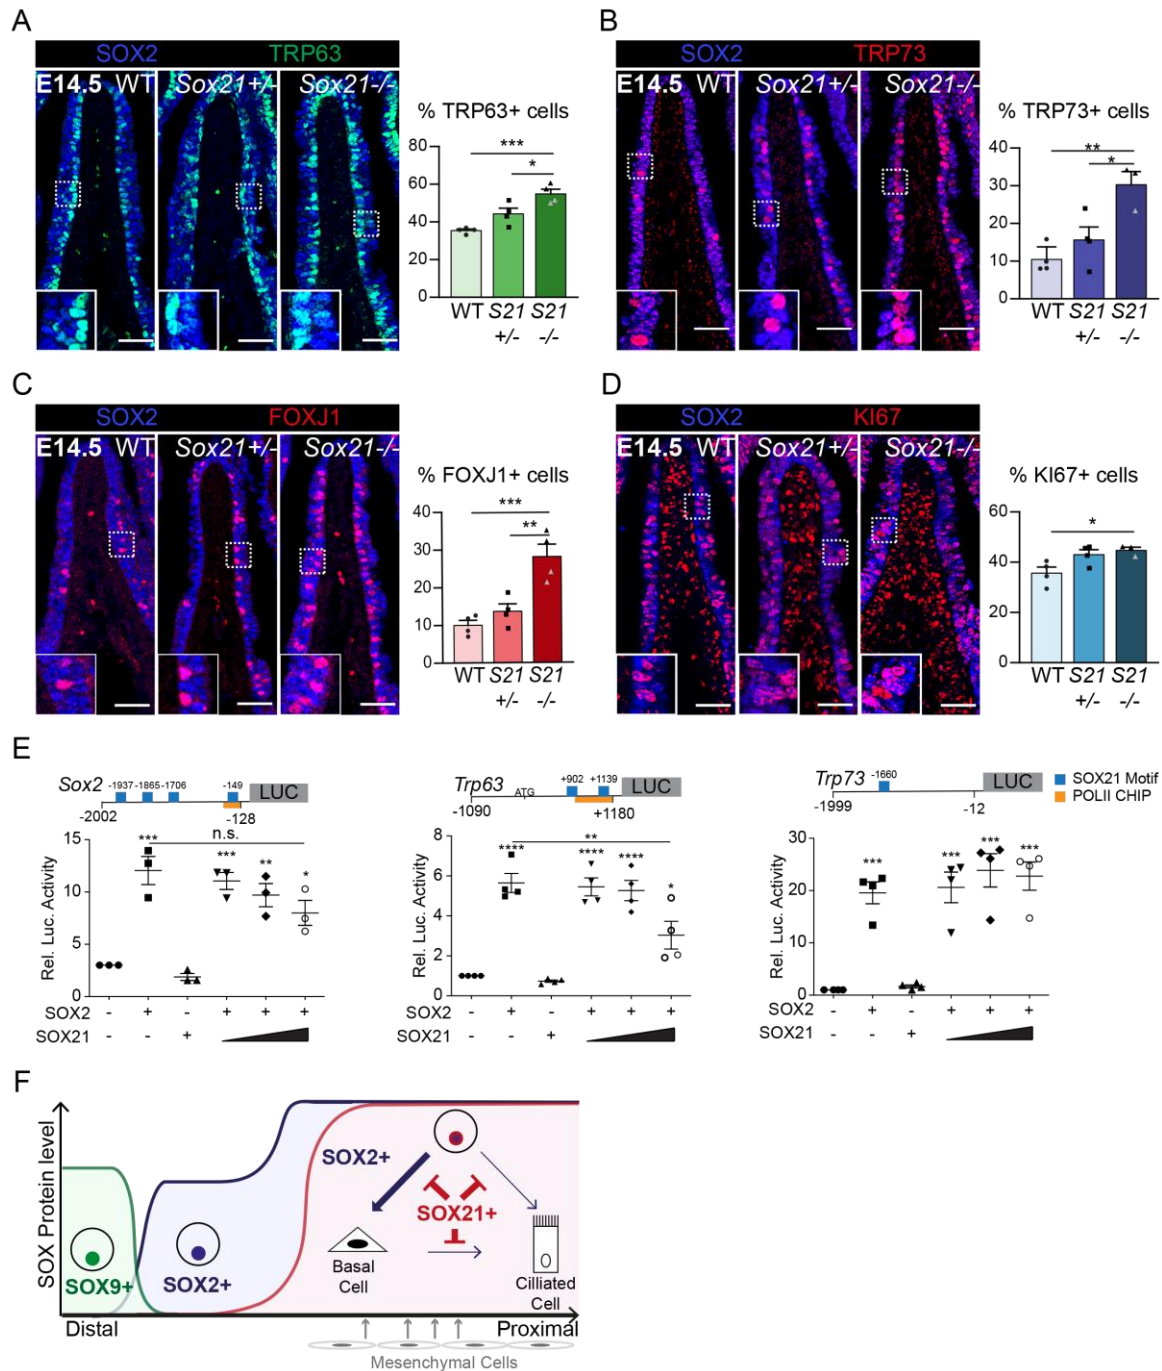

837

838

839

**Figure 3 SOX21 counter balances SOX2+ progenitor differentiation to airway specific cell types.**

840

(A-D) Immunofluorescence and quantification of the number of TRP63<sup>+</sup> basal cells (A), TRP73<sup>+</sup> cells (B), FOXJ1<sup>+</sup> ciliated cells (C) and KI67<sup>+</sup> dividing cells (D) at E14.5 in wildtype (WT), Sox21<sup>+/-</sup> and Sox21<sup>-/-</sup> mice. The number of cells were counted within the first 400  $\mu$ m immediately distal of the carina at the medial side of the airway. One-way ANOVA (n=3; \* p<0.05). Scale bar = 50  $\mu$ m.

844

845 (E) Luciferase assay to test the transcriptional activity of a the *Sox2* promoter region from -  
846 2002 till -128, *Trp63* promoter region from -1090 till +1180 and *Trp73* promoter region from -  
847 1999 till -12 (+1 is considered the transcriptional start site). Blue squares showing SOX21  
848 binding motifs and the orange bar shows the region bound by RNA polymerase II. The graph  
849 shows luciferase activity induced after transfection of FLAG-SOX2 and/or increasing  
850 amounts of MYC-SOX21 were co-expressed. One-way ANOVA (n=3; \*\* p<0.01, \*\*\* p<0.001,  
851 \*\*\*\* p<0.0001, when not indicated otherwise, stars show significance compared to control).

852 (F) Schematic overview of epithelial progenitor maintenance and differentiation during murine  
853 lung development. From distal to distal a transition of SOX protein levels takes place. The  
854 most proximal part of the lung, the trachea and the two main bronchial branches, show high  
855 expression levels of SOX2, which initiates the expression of SOX21. SOX21 balances the  
856 maintenance of the SOX2 progenitor state in a zone where progenitor cells are prone to  
857 differentiate to airway specific cell types. High SOX2 levels stimulate differentiation.

858  
859

**Figure 4**

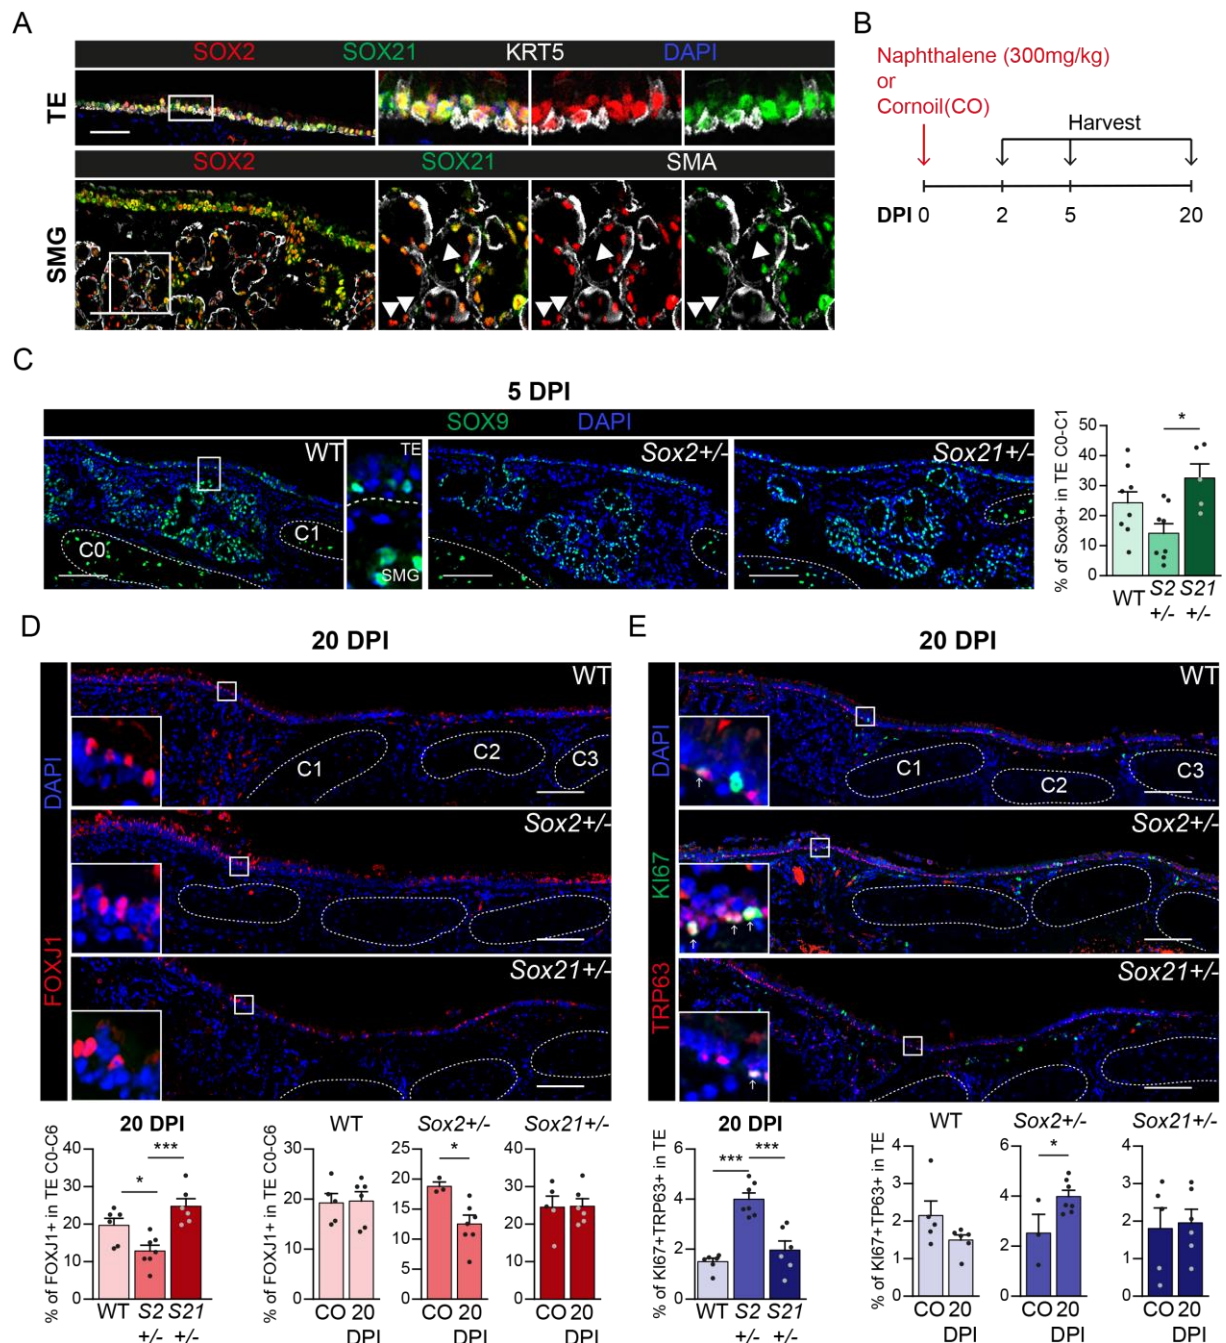

**Figure 4. Regeneration is delayed in SOX2 deficient tracheal epithelium**

860  
861  
862 (A) Immunofluorescence staining on tracheal sections of adult wild-type mice for SOX2 (red),  
863 SOX21 (green) and KRT5 (grey, top row) or smooth muscle actin (SMA, bottom row). TE =  
864 tracheal epithelium. SMG = submucosal gland. Closed arrowheads (▶) indicate single  
865 SOX2+ cells. Scale bar = 100  $\mu$ m.

866 (B) Schematic overview of the experimental set up of the Naphthalene injury and recovery in  
867 wildtype (WT), *Sox2*<sup>+/-</sup> (*S2*<sup>+/-</sup>) and *Sox21*<sup>+/-</sup> (*S21*<sup>+/-</sup>) mice.

868 (C) Immunofluorescence and quantification of the number of SOX9+ cells ,5 days post injury  
869 (DPI), in the upper TE from Cartilage (C) ring 0 till C1 in WT, *Sox2*<sup>+/-</sup> and *Sox21*<sup>+/-</sup> mice.  
870 Scale bar = 100  $\mu$ m. One-way ANOVA (WT n = 8, *Sox2*<sup>+/-</sup> n = 8, *Sox21*<sup>+/-</sup> n = 5, \* p<0.05)

871 (D) Immunofluorescence of FOXJ+ (red) cells in the TE, of WT, *Sox2*<sup>+/-</sup> and *Sox21*<sup>+/-</sup> mice  
872 at 20 DPI. Scale bar = 100  $\mu$ m. Quantification of the number of FOXJ1+ ciliated cells from C0  
873 till C6 between genotypes. One-way ANOVA (WT n = 6, *Sox2*<sup>+/-</sup> n = 7, *Sox21*<sup>+/-</sup> n = 6, \*  
874  $p < 0.05$ , \*\*\*  $p < 0.001$ ). Quantification of the number of ciliated cells, 20 DPI compared to the  
875 cornoil (CO) exposed mice of each WT, *Sox2*<sup>+/-</sup> and *Sox21*<sup>+/-</sup> mice. T-test (WT: CO n = 5  
876 and 20DPI n = 6, *Sox2*<sup>+/-</sup>: CO n = 3 and 20DPI n = 7, *Sox21*<sup>+/-</sup>: CO n = 4 and 20DPI n = 6, \*  
877  $p < 0.05$ ).

878 (E) Immunofluorescence with TRP63 (red) and KI67 (green) to mark dividing basal cells in  
879 the TE, 20 DPI, in WT, *Sox2*<sup>+/-</sup> and *Sox21*<sup>+/-</sup> mice. Scale bar = 100  $\mu$ m. Quantification of the  
880 number of dividing basal cells from C0 till C6 between genotypes. One-way ANOVA (WT n =  
881 6, *Sox2*<sup>+/-</sup> n = 7, *Sox21*<sup>+/-</sup> n = 6, \*\*\*  $p < 0.001$ ). Quantification of dividing basal cells, 20 DPI  
882 compared to CO mice of each wildtype (WT), *Sox2*<sup>+/-</sup> and *Sox21*<sup>+/-</sup>. T-test (WT: CO n = 5  
883 and 20DPI n = 6, *Sox2*<sup>+/-</sup>: CO n = 3 and 20DPI n = 7, *Sox21*<sup>+/-</sup>: CO n = 4 and 20DPI n = 6, \*  
884  $p < 0.05$ ).

885



Figure 5

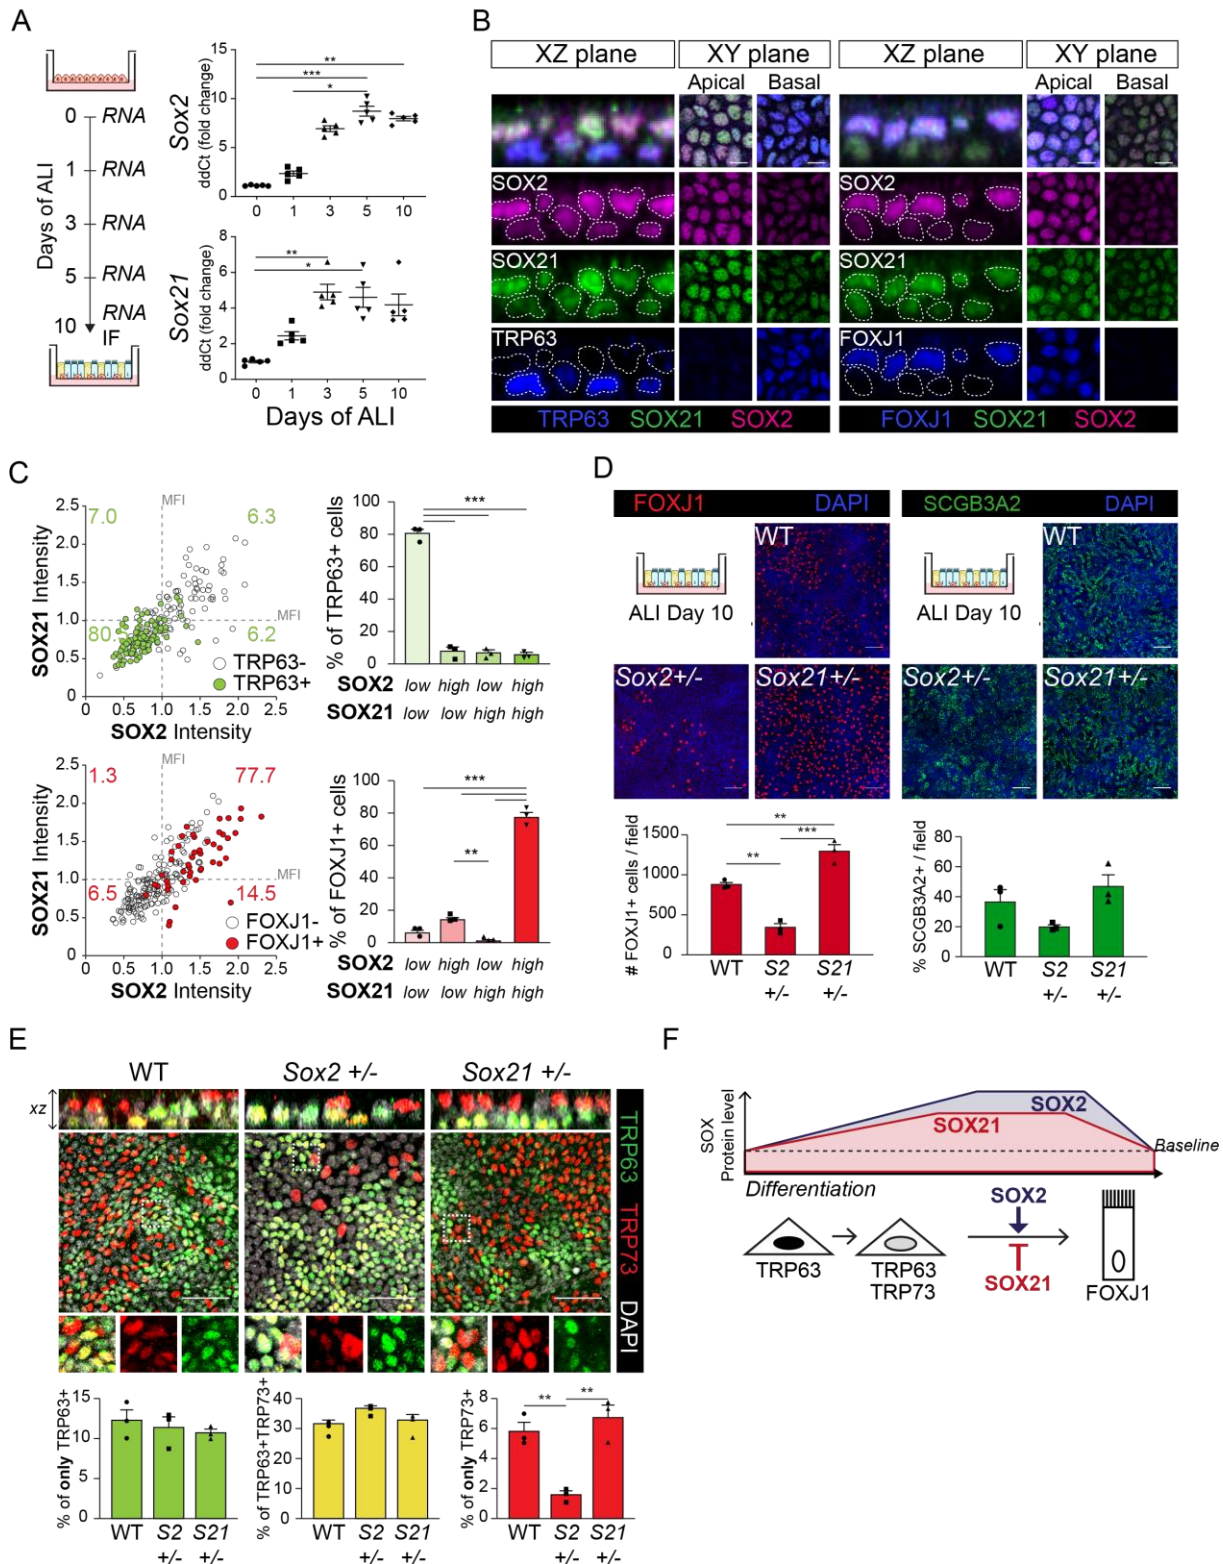

886  
887  
888  
889  
890  
891

**Figure 5. SOX2 and SOX21 are inversely correlated with basal cell differentiation to ciliated cells**

(A) Schematic overview of mouse tracheal epithelial cell (MTEC) culture. QPCR analysis of Sox2 and Sox21 expression during differentiation of MTECs on Air-Liquid Interface (ALI). One-way ANOVA (n=5; \* p<0.05, \*\* p<0.01, \*\*\* p<0.001).

892 (B) Immunofluorescence staining on MTEC 10 days after ALI of SOX2 (purple), SOX21  
893 (green), and TRP63 (blue, left images) or FOXJ1 (blue, right images). Dotted lines show  
894 representation of measured nuclei for fluorescence intensity. Scale bar = 25  $\mu$ m.

895 (C) Dot-plot of the MFI of SOX2 (x-as) and SOX21 (y-as). The green filled circles are  
896 TRP63+ basal cells and the number in each quadrant represents the percentage of basal  
897 cells in each quadrant. Bar graph is the quantification of basal cells that are either high  
898 (MFI>1) or low (MFI<1) in expression of SOX2 and SOX21. The red filled circles are FOXJ1+  
899 ciliated cells and the number in each square represents the percentage of ciliated cells in  
900 each quadrant. Bar graph is the quantification of ciliated cells that are either high (MFI>1) or  
901 low (MFI<1) in expression of SOX2 and SOX21. One-way ANOVA (n=3; \*\* p<0.01, \*\*\*  
902 p<0.001).

903 (D) Analysis of MTEC cultures of tracheal cells derived from wildtype (WT), Sox2+/- or  
904 Sox21+/- animals after 10 days of ALI culture. Immunofluorescence staining of ciliated cells  
905 (FOXJ1, red; C) or secretory cells (SCGB3A2, green; D). Scale bar = 50  $\mu$ m. Quantification  
906 of the number of ciliated cells per 775x775  $\mu$ m field. One-way ANOVA (n=3; \*\* p<0.01).

907 (E) Analysis of MTEC cultures of tracheal epithelial cells derived from wildtype (WT), Sox2+/-  
908 or Sox21+/- animals, after 10 days of ALI culture. Immunofluorescence staining of TRP63  
909 (green) and TRP73 (red). Scale bar = 50  $\mu$ m. Quantification of the percentage of TRP63+  
910 only basal cells, TRP73+ only cells, and TRP63+TRP73+ double positive basal cells. One-  
911 way ANOVA (n=3; \*\* p<0.01).

912 (F) Schematic overview of in vitro basal cell differentiation. SOX2 and SOX21 are expressed  
913 at basal levels but upon differentiation stimuli, expression levels increase. Both proteins are  
914 highest expressed in luminal cells and ciliated cells. We propose a model, where SOX2  
915 stimulates the transition of basal to ciliated cells, while SOX21 acts as an inhibitor in this  
916 process. Due, to the presence of FOXJ1+ SOX2<sup>high</sup>SOX21<sup>low</sup> cells we propose a sooner  
917 downregulation of SOX21 to baseline levels.

918  
919

**Figure 6**

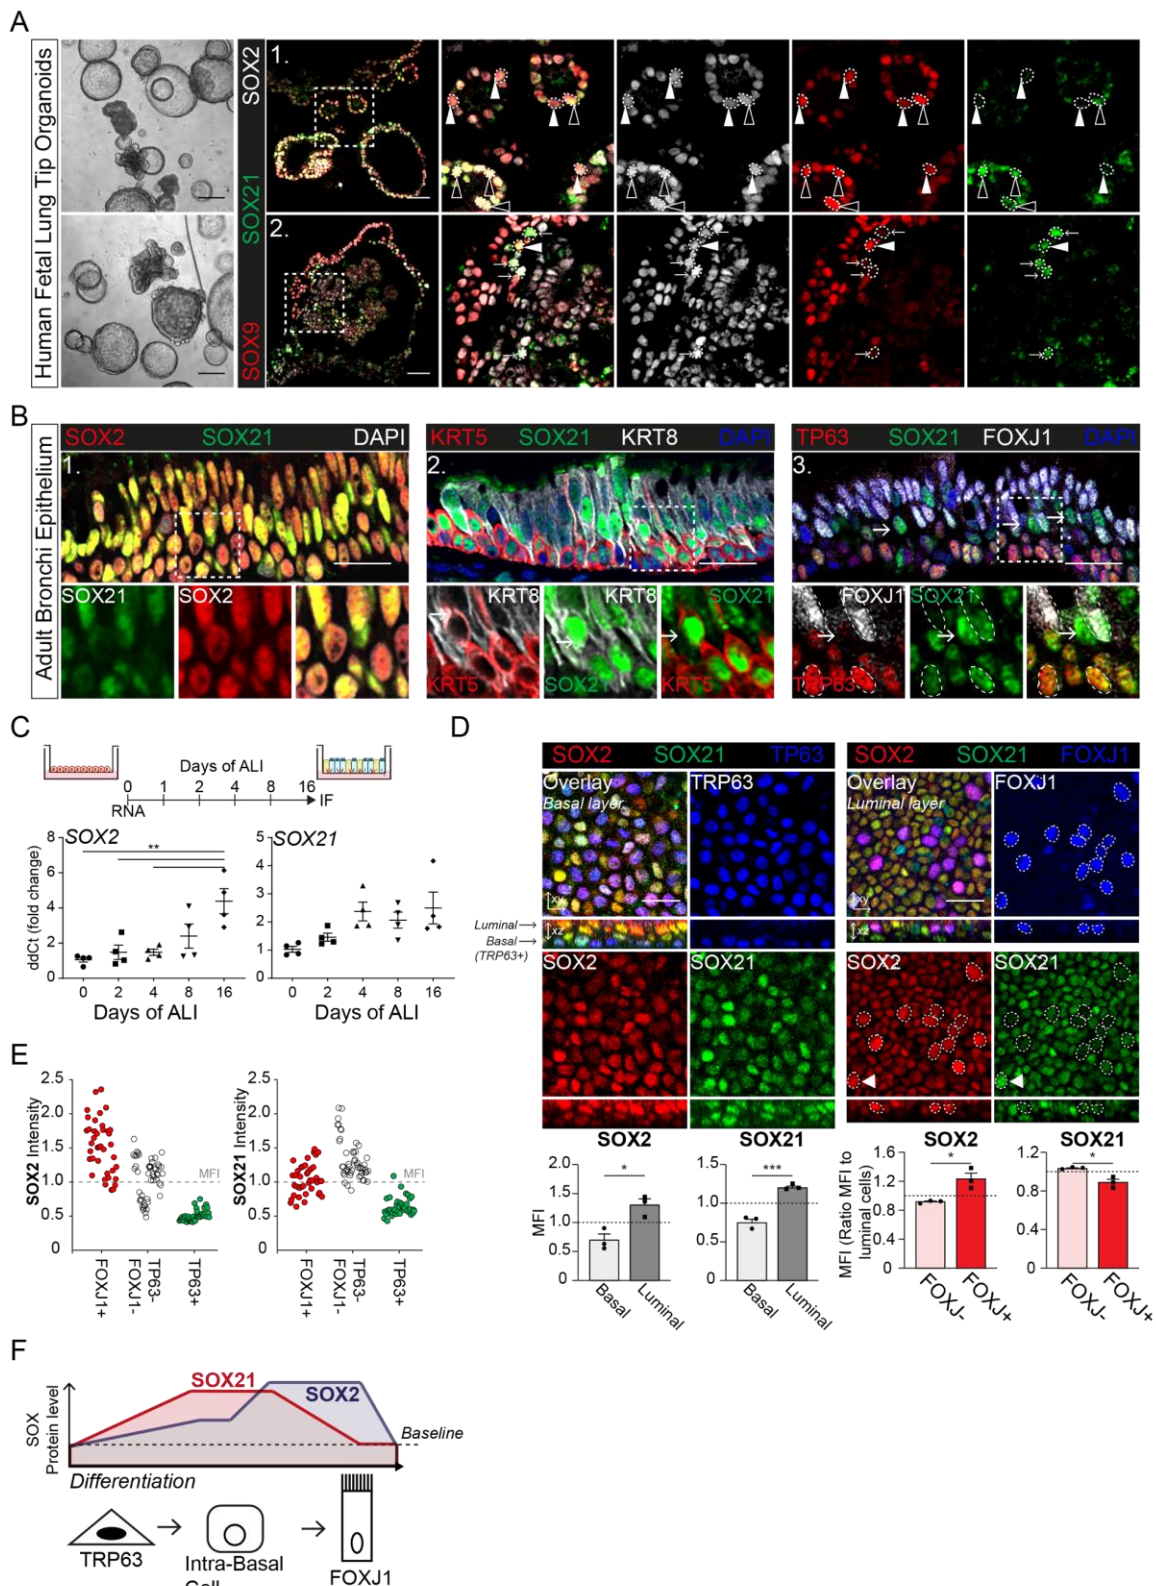

920  
921

**Figure 6. Evolutionary conserved expression of SOX21 in human airway epithelium**

922 (A) Bright field images of human fetal lung tip organoids (scale bar = 250  $\mu$ m) and  
923 immunofluorescence analysis shows SOX2 (grey), SOX9 (red) and SOX21 (green) positive  
924 cells in fetal lung organoids. Closed triangles ( $\blacktriangleright$ ) show cells positive for SOX2 and SOX9,

925 open triangles ( $\triangleright$ ) show cells positive for SOX2, SOX21 and SOX9. Arrows ( $\rightarrow$ ) show cells  
926 positive for SOX21 and SOX2. Scale bar = 50  $\mu$ m.

927 (B) Immunofluorescence analysis of sections of human adult bronchi shows co-localization of  
928 SOX2 (red) and SOX21 (green) throughout the epithelium (1). SOX21 (green) is expressed  
929 in luminal (KRT8; grey) and basal (KRT5; red) cells (2). SOX21 is expressed basal (TRP63;  
930 red) and ciliated (FOXJ1; grey) and is high expressed in cells absent of P63 and FOXJ1( $\rightarrow$ )  
931 (3). Scale bar = 25  $\mu$ m.

932 (C) Schematic overview of human primary bronchial epithelial cell (HPBEC) culture. QPCR  
933 analysis of SOX2 and SOX21 expression during differentiation of HPBECs on Air-Liquid  
934 Interface (ALI). One-way ANOVA (n=4 (ALI cultures of 4 different donors); \*\*\* p<0.001).

935 (D) Immunofluorescence analysis of HPBEC 16 days after ALI of SOX2 (red), SOX21  
936 (green), and TP63 (blue) or FOXJ1 (blue). XZ plane shows basal cells (TP63+) at the basal  
937 membrane and ciliated cells (FOXJ1+) at the luminal side. Scale bar = 25  $\mu$ m. The grey bar  
938 graphs the MFI of SOX2 or SOX21 in basal and luminal cells. The red bar graphs show the  
939 MFI of SOX2 or SOX21 in FOXJ+ and FOXJ- luminal cells. The circled FOXJ1+ nuclei show  
940 high expression of SOX2 with sporadic high expression of SOX21( $\blacktriangleleft$ ) as well. T-test (n=3  
941 (ALI cultures of 3 different donors); \*p<0.05, \*\*\* p<0.001).

942 (E) Dot-plot of the MFI of SOX2 (y-as: left graph) or SOX21 (y-as: right graph). Each dot  
943 represents a cell and ALI cultures of 2 different donors are included. The red filled circles are  
944 FOXJ1+ ciliated cells, green filled circles are TP63+ basal cells and non-filled are FOXJ1-  
945 TRP63- cells.

946 (F) Schematic overview of in vitro basal cell differentiation. In human, SOX21 levels are high  
947 in an intermediate state, SOX21 levels are decreasing when FOXJ1 is present. SOX2 levels  
948 are mainly elevated in the end stage of differentiation to ciliated cells (FOXJ1+).

949

950 **TABLE 1: Medium**  
951

| KSFM-hPBEC medium           |              |            |                     |
|-----------------------------|--------------|------------|---------------------|
| Reagent                     | Company      | Cat. No.   | Final Concentration |
| KSFM                        | Gibco        | 17005034   | n/a                 |
| Penicillin / Streptomycin   | Lonza        | DE17-602e  | 100 U/ml 100 µg/ml  |
| Bovine Pituitary Extract    | Gibco        | 13028014   | 0.03 mg/ml          |
| Human EGF                   | Peprtech     | 315-09     | 25 ng/ml            |
| Isoproterenol               | Sigma        | I-6504     | 1 µM                |
| KSFM-MTEC Expansion medium  |              |            |                     |
| Reagent                     | Company      | Cat. No.   | Final Concentration |
| KSFM                        | Gibco        | 17005034   | n/a                 |
| Penicillin / Streptomycin   | Lonza        | DE17-602e  | 100 U/ml 100 µg/ml  |
| Bovine Pituitary Extract    | Gibco        | 13028014   | 0.03 mg/ml          |
| Mouse EGF                   | Peprtech     | 315-09     | 25 ng/ml            |
| Isoproterenol               | Sigma        | I-6504     | 1 µM                |
| Rock Inhibitor (Y27632)     | Axon MedChem | 1683       | 10 µM               |
| DAPT                        | Axon MedChem | 1484       | 5 µM                |
| MTEC Proliferation Medium   |              |            |                     |
| Reagent                     | Company      | Cat. No.   | Final Concentration |
| DMEM:F12                    | Gibco        | 1133032    | n/a                 |
| Penicillin / Streptomycin   | Lonza        | DE17-602e  | 100 U/ml 100 µg/ml  |
| NaHCO <sub>3</sub>          | Gibco        | 25080094   | 0.03% (w/v)         |
| Fetal Calf Serum            | HyClone      | SH30071.03 | 5%                  |
| L-Glutamine                 | Gibco        | 25030081   | 1.5 mM              |
| Insulin-Transferin-Selenium | Gibco        | 41400045   | 1x                  |
| Cholera Toxin               | Sigma        | C8052      | 0.1 µg/ml           |
| Bovine Pituitary Extract    | Gibco        | 13028014   | 0.03 mg/ml          |
| Mouse EGF                   | Peprtech     | 315-09     | 25 ng/ml            |
| Rock Inhibitor (Y27632)     | Axon MedChem | 1683       | 10 µM               |
| Retinoic Acid               | Sigma        | R2625      | 0.05 µM             |
| MTEC Differentiation Medium |              |            |                     |
| Reagent                     | Company      | Cat. No.   | Final Concentration |
| DMEM:F12                    | Gibco        | 1133032    | n/a                 |
| Penicillin / Streptomycin   | Lonza        | DE17-602e  | 100 U/ml 100 µg/ml  |
| NaHCO <sub>3</sub>          | Gibco        | 25080094   | 0.03% (w/v)         |
| Bovine Serum Albumin        | Gibco        | 15260037   | 0.1% (w/v)          |
| L-Glutamine                 | Gibco        | 25030081   | 1.5 mM              |
| Insulin-Transferin-Selenium | Gibco        | 41400045   | 1x                  |
| Cholera Toxin               | Sigma        | C8052      | 0.025 µg/ml         |

| Bovine Pituitary Extract     | Gibco            | 13028014  | 0.03 mg/ml              |
|------------------------------|------------------|-----------|-------------------------|
| Mouse EGF                    | Peprtech         | 315-09    | 5 ng/ml                 |
| Retinoic Acid                | Sigma            | R2625     | 0.05 $\mu$ M            |
| Human Foetal Organoid medium |                  |           |                         |
| Reagent                      | Company          | Cat. No.  | Final Concentration     |
| Advanced DMEM:F12            | Invitrogen       | 12634-034 | n/a                     |
| R-Spondin                    | Peprtech         | 120-38    | 500 ng/ml               |
| Noggin                       | Peprtech         | 120-10C   | 100 ng/ml               |
| Fgf10                        | Peprtech         | 100-26    | 100 ng/ml               |
| Fgf7                         | Peprtech         | 100-19    | 100 ng/ml               |
| EGF                          | Peprtech         | AF-100-15 | 50 ng/ml                |
| CHIR 99021                   | Stem Cell Techn. | 72052     | 3 $\mu$ M               |
| SB 431542                    | Tocris           | 1614      | 10 $\mu$ M              |
| B27 supplement (- VitA)      | ThermoFisher     | 12587-010 | 1x                      |
| N-Acetylcysteine             | Sigma            | A9165     | 1.25 mM                 |
| Glutamax 100x                | Invitrogen       | 12634-034 | 1x                      |
| N2                           | ThermoFisher     | 17502-048 | 1x                      |
| Hepes                        | Gibco            | 15630-56  | 10 mM                   |
| Penicillin / Streptomycin    | Lonza            | DE17-602e | 100 U/ml 100 $\mu$ g/ml |
| Primocin                     | Invivogen        | Ant-pm-1  | 50 $\mu$ g/ml           |
| Human Adult Organoid medium  |                  |           |                         |
| Reagent                      | Company          | Cat. No.  | Final Concentration     |
| Advanced DMEM:F12            | Invitrogen       | 12634-034 | n/a                     |
| R-Spondin                    | Peprtech         | 120-38    | 500 ng/ml               |
| Noggin                       | Peprtech         | 120-10C   | 100 ng/ml               |
| Fgf10                        | Peprtech         | 100-26    | 100 ng/ml               |
| Fgf7                         | Peprtech         | 100-19    | 25 ng/ml                |
| SB202190                     | Sigma            | S7067     | 500 nM                  |
| A83-01                       | Tocris           | 2939      | 500 nM                  |
| Y-27632                      | Axon MedChem     | 1683      | 5 $\mu$ M               |
| B27 supplement               | Gibco            | 17504-44  | 1x                      |
| N-Acetylcysteine             | Sigma            | A9165     | 1.25 mM                 |
| Nicotinamide                 | Sigma            | N0636     | 5 mM                    |
| Glutamax 100x                | Invitrogen       | 12634-034 | 1x                      |
| Hepes                        | Gibco            | 15630-56  | 10 mM                   |
| Penicillin / Streptomycin    | Lonza            | DE17-602e | 100 U/ml 100 $\mu$ g/ml |
| Primocin                     | Invivogen        | Ant-pm-1  | 50 $\mu$ g/ml           |

953 **TABLE 2: Antibodies**

| Primary antibodies         |         |                |           |                    |
|----------------------------|---------|----------------|-----------|--------------------|
| Antibody                   | Species | Company        | Cat. No.  | Dilution           |
| $\beta$ -TUBULIN IV        | Mouse   | BioGenex       | MU178-UC  | 1:100              |
| FOXJ1                      | Mouse   | eBioscience    | 14-9965   | 1:200              |
| KRT5                       | Rabbit  | Biologend      | Poly19055 | 1:500              |
| KRT8                       | Rat     | DSHB           | TROMA-I   | 1:100              |
| MYC (Immunofluorescence)   | Rabbit  | Abcam          | AB9106    | 1:500              |
| SCGB1A1(CCSP, uteroglobin) | Rabbit  | Abcam          | AB40873   | 1:200              |
| SCGB3A1 / HIN-1            | Mouse   | R&D systems    | AF1790    | 1:200              |
| SCGB3A2 / UGRP1            | Goat    | R&D systems    | AF3465    | 1:500              |
| SMOOTH MUSCLE ACTIN        | Mouse   | Neomarkers     | MS-113-P1 | 1:500              |
| SOX2                       | Rabbit  | Seven-Hills    | WRAB-SOX2 | 1:500              |
| SOX2                       | Goat    | Immune systems | GT15098   | 1:500              |
| SOX21                      | Goat    | R&D systems    | AF3538    | 1:100 (TSA: 9 min) |
| SOX9                       | Rabbit  | Abcam          | AB185230  | 1:500              |
| TRP63                      | Mouse   | Abcam          | AB735     | 1:100              |
| TRP73                      | Rabbit  | Abcam          | AB40658   | 1:100              |
| FLAG                       | Rabbit  | Sigma          | F7425     | 1:1000             |
| MYC (Western Blot)         | Rabbit  | Abcam          | AB9106    | 1:1000             |
| $\beta$ -TUBULIN           | Mouse   | Sigma          | T8328     | 1:2000             |

954

| Secondary antibodies                                                         |                        |                                             |          |
|------------------------------------------------------------------------------|------------------------|---------------------------------------------|----------|
| Antibody                                                                     | Company                | Cat. No.                                    | Dilution |
| Alexa Fluor $\text{\textcircled{R}}$ 405, 488, 594<br>Donkey anti Goat IgG   | Jackson ImmunoResearch | 705-475-147,<br>705-545-147,<br>705-585-147 | 1:500    |
| Alexa Fluor $\text{\textcircled{R}}$ 488, 594, 647<br>Donkey anti Mouse IgG  | Jackson ImmunoResearch | 715-545-151,<br>715-585-151,<br>711-605-151 | 1:500    |
| Alexa Fluor $\text{\textcircled{R}}$ 488, 594, 647<br>Donkey anti Rabbit IgG | Jackson ImmunoResearch | 711-545-152,<br>711-585-151,<br>711-605-152 | 1:500    |
| Alexa Fluor $\text{\textcircled{R}}$ 488, 594<br>Donkey anti Rat IgG         | Jackson ImmunoResearch | 712-545-150<br>712-585-153                  | 1:500    |
| Anti-Goat HRP conjugated                                                     | Jackson ImmunoResearch | 705-035-147                                 | 1:500    |

955

956

957 **TABLE 3: RT-PCR primers**

| RT-primers                     |                          |                          |         |
|--------------------------------|--------------------------|--------------------------|---------|
| Gene                           | Forward (5'→3')          | Reverse (5'→3')          | Species |
| <i>Foxj1</i>                   | CAGACCCACCTGGCAGAATTC    | AAAGGCAGGGTGGATGTGGACT   | Mouse   |
| <i>Gapdh</i><br>(housekeeping) | CCTGCCAAGTATGATGACAT     | GTCCTCAGTGTAGCCCAAG      | Mouse   |
| <i>Krt5</i>                    | TACCAGACCAAGTATGAGGAG    | TGGATCATTTCGGTTCATCTCAG  | Mouse   |
| <i>Scgb1a1</i>                 | GCAGCTCAGCTTCTTCGGACA    | TCCTGGTCTCTTGTGGGAGGG    | Mouse   |
| <i>Scgb3a2</i>                 | GTGGTTATTCTGCCACTGCCCTT  | TCGTCCACACACTTCTTCAGTCC  | Mouse   |
| <i>Sox2</i>                    | AACATGGCAATCAAATGTC      | TTGCCAGTACTTGCTCTCAT     | Mouse   |
| <i>Sox21</i>                   | TTGAAAGATGCCTCTCACCA     | AATAAGCTAAATGGGAAGGGAG   | Mouse   |
| <i>Trp63</i>                   | GGAAAACAATGCCCAGACTC     | GATGGAGAGAGGGCATCAAA     | Mouse   |
| <i>Actin</i><br>(housekeeping) | ATTGGCAATGAGCGGTTC       | GGATGCCACAGGACTCCAT      | Human   |
| <i>Foxj1</i>                   | CCCACCTGGCAGAATTCAATCCG  | CAGTCGCCGCTTCTTGAAAGC    | Human   |
| <i>Scgb1a1</i>                 | GCTCCGCTTCTGCAGAGATCTG   | GCTTTTGGGGGAGGGTGTCCA    | Human   |
| <i>Scgb3a1</i>                 | TGCTGGGGGCCCTGACA        | ACGTTTATTGAGAGGGGCCGG    | Human   |
| <i>Sox2</i>                    | AATGCCTTCATGGTGTGGTC     | TTGCTGATCTCCGAGTTGTG     | Human   |
| <i>Sox21</i>                   | CCACTCGCTTGGATTTCTGACACA | TCGACTCAAACCTTAGGGCAACGA | Human   |
| <i>Trp63</i>                   | CCACCTGGACGTATTCCACTG    | TCGAATCAAATGACTAGGAGGGG  | Human   |

958

959



960 **TABLE 4:** *Primers used for pGL4.10[luc2] cloning*

| Primers used for pGL4.10[luc2] cloning |                                               |          |
|----------------------------------------|-----------------------------------------------|----------|
| Name                                   | Primers (5'→3') cut site                      | Cut site |
| <i>Trp63</i>                           | <u>Forward:</u> CAGGGTACCGGGCACATTCCATCTTTCCT | KpnI     |
|                                        | <u>Reverse:</u> CAGCTCGAGAGACTGGTCAAGGCTGCTCT | Xho      |
| <i>Sox2</i>                            | <u>Forward:</u> CAGGGTACCGCGAGAGTATTGCAGGGAA  | KpnI     |
|                                        | <u>Reverse:</u> CAGGCTAGCCGGAGATCTGGCGGAGAATA | NheI     |
| <i>Trp73</i>                           | <u>Forward:</u> CAGGGTACCGGACACGCATCTGTTGTGGA | KpnI     |
|                                        | <u>Reverse:</u> CAGCTCGAGTCTGCACACGCTGAGGAGCT | Xho      |

961

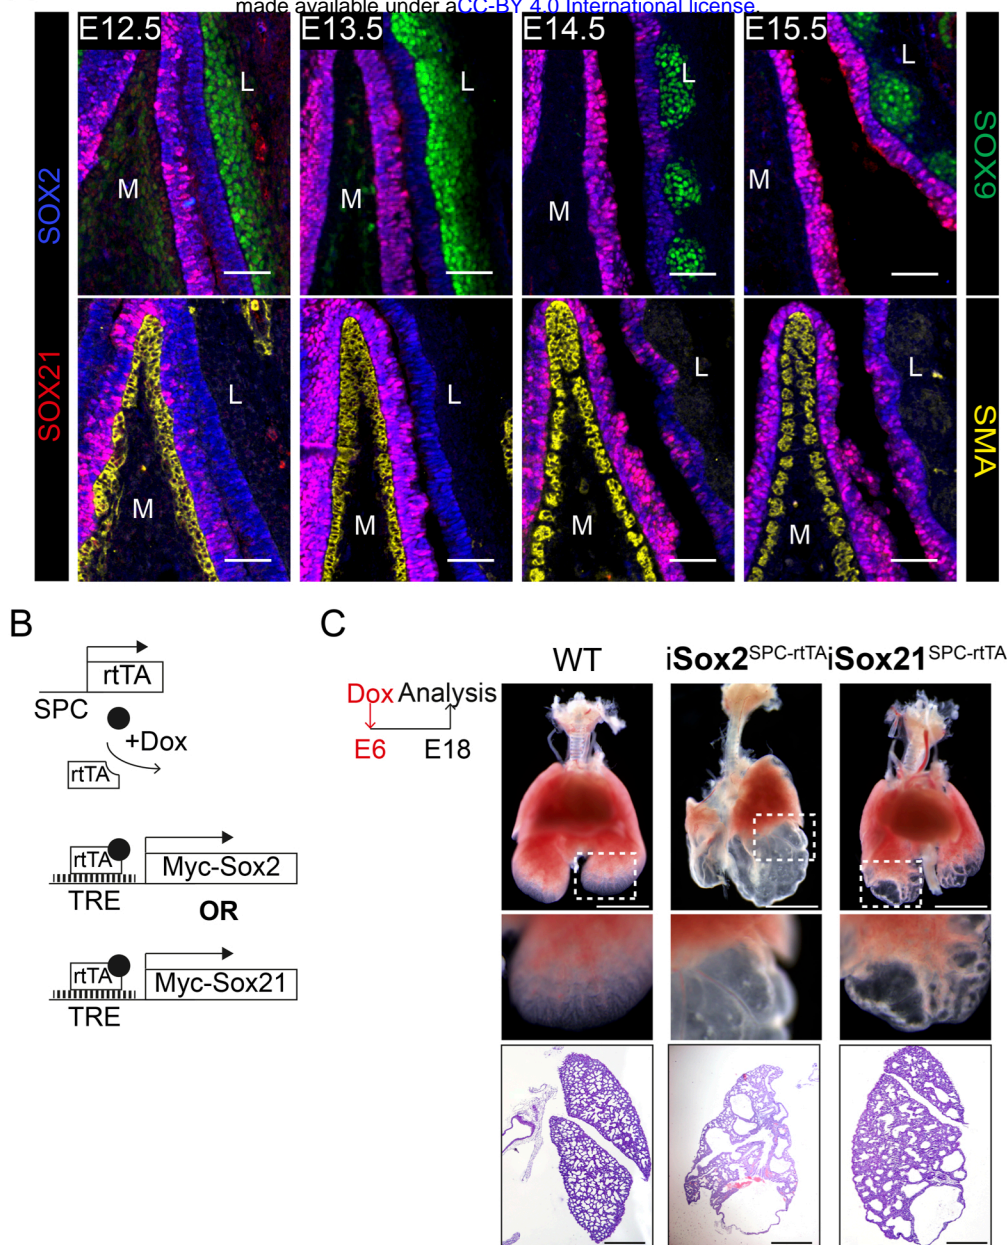

**Sup. Figure 1: SOX21 is unilateral detected in the developing trachea and overexpression of SOX21 leads to lung cysts.**

(A) Immunostaining on sections of the main bronchi immediately distal of the carina from mice at embryonic day (E) 12.5, 13.5, 14.5, and 15.5 using SOX2 (blue), SOX21 (red) and either SOX9 (green, top row) or SMA (yellow, bottom row). The mesenchymal cells on the medial (M) side express Smooth Muscle Actin (SMA, yellow). At the lateral (L) side, mesenchymal cells express SOX9 (green). Scale bar = 50  $\mu$ m.

(B) Schematic representation of the  $iSox2^{SPC-rtTA}$  and  $iSox21^{SPC-rtTA}$  mouse models.

(C) Bright field images of E18.5 lungs from control,  $iSox2^{SPC-rtTA}$  and  $iSox21^{SPC-rtTA}$  mice that received doxycycline from E6 onwards. Scale bar = 2 mm. HE staining of the lungs show the size of the cysts that are present in the lungs of  $iSox2^{SPC-rtTA}$  and  $iSox21^{SPC-rtTA}$  mice. Scale bar = 0.5 mm.

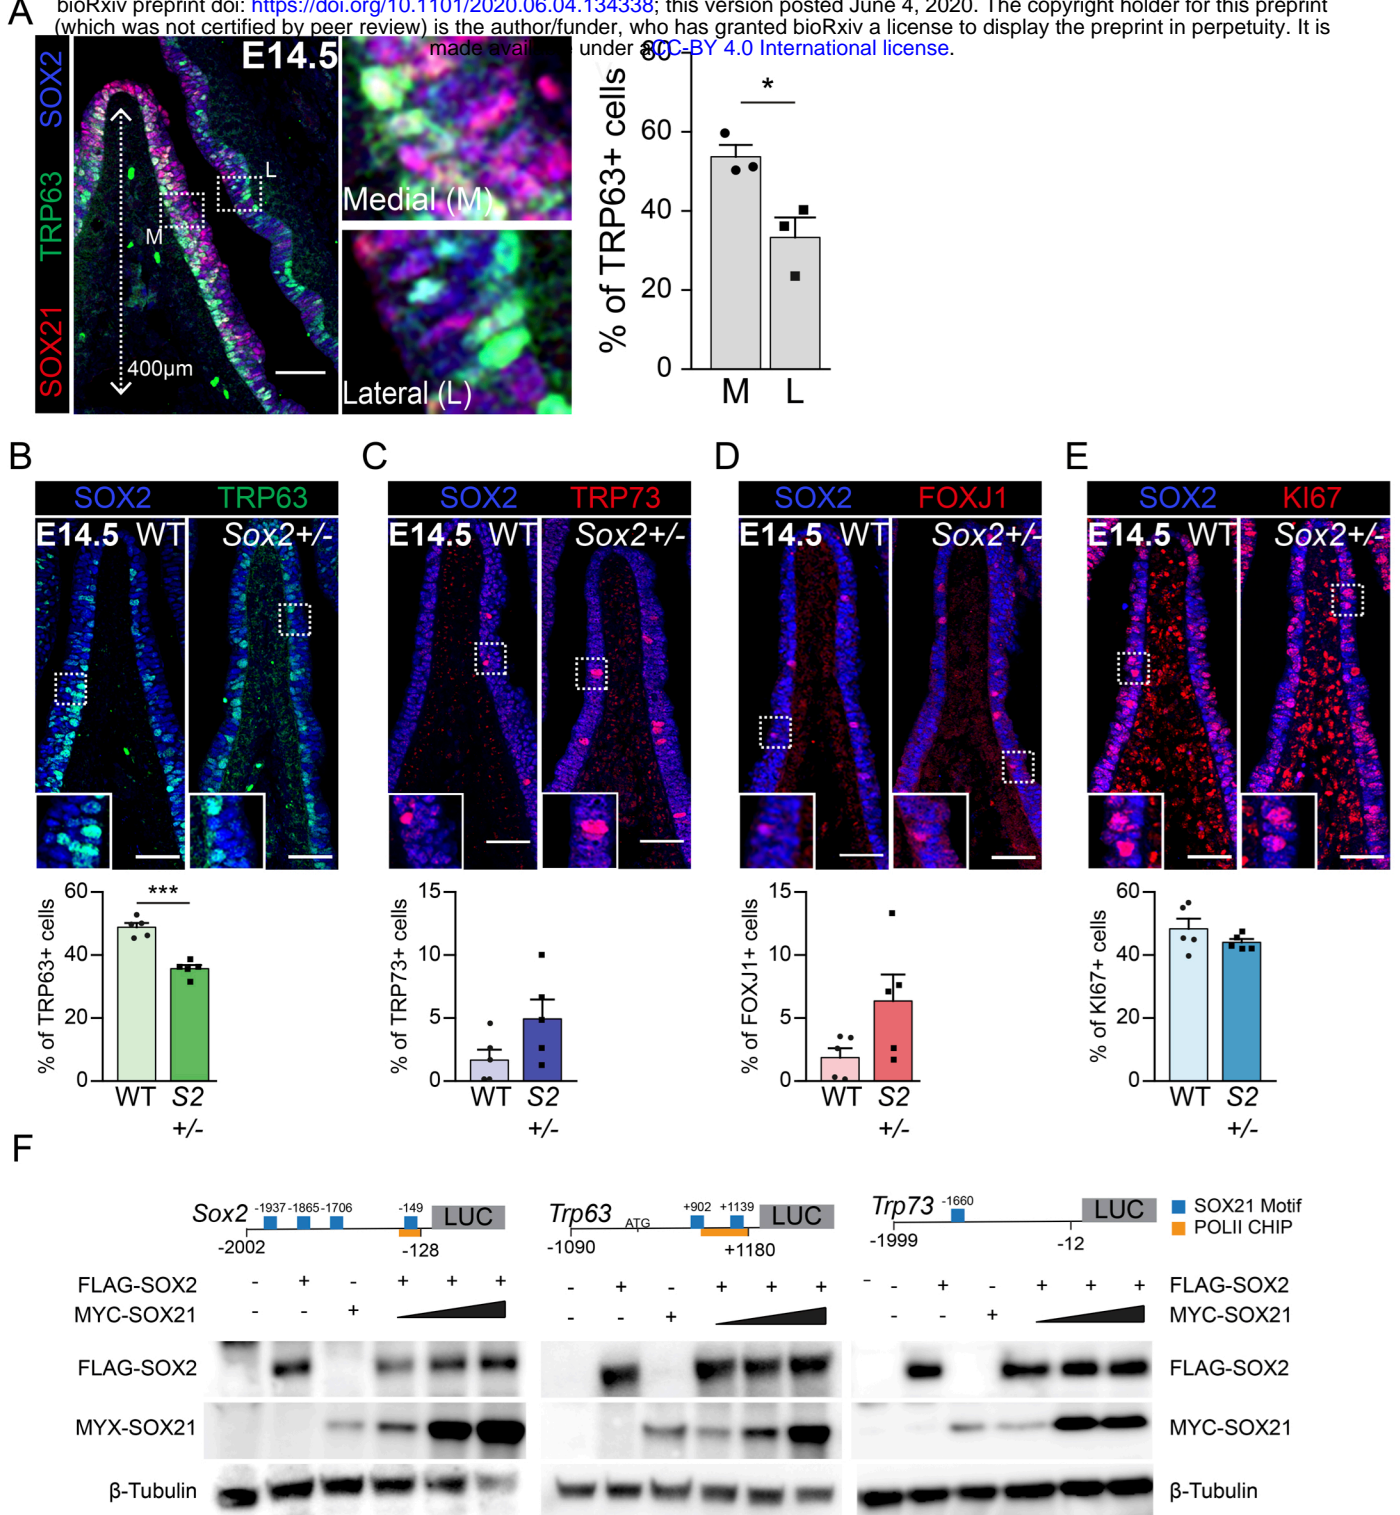

### Sup. Figure 2: Basal cells arise in the SOX2+ SOX21+ region

(A) Co-staining of TRP63 (green) for basal cells, SOX2 (blue) and SOX21 (red) on longitudinal sections of the main bronchi at E14.5. The graph shows the percentage of basal cells in medial versus lateral side of the bronchi 400  $\mu$ m proximal of the first branch. T- test (n=3; \*p<0.05, \*\*\* p<0.001). M = medial, L = lateral. Scale bar = 100  $\mu$ m.

(B-E) Immunofluorescence and quantification of the number of TRP63+ basal cells (B), TRP73+ cells (C), FOXJ1+ ciliated cells (D) and KI67+ dividing cells (E) at E14.5 in wildtype (WT) and Sox2+/- mice. The number of cells were counted within the first 400  $\mu$ m immediately distal of the carina at the medial side of the airway. T-test (n=5; \* p<0.05, \*\*\* p<0.001). Scale bar = 50  $\mu$ m.

(G) Western blots showing the protein levels of transfected FLAG-SOX2 and MYC-SOX21 of the luciferase assay belonging to figure 3E. Beta-tubulin was used as loading control.

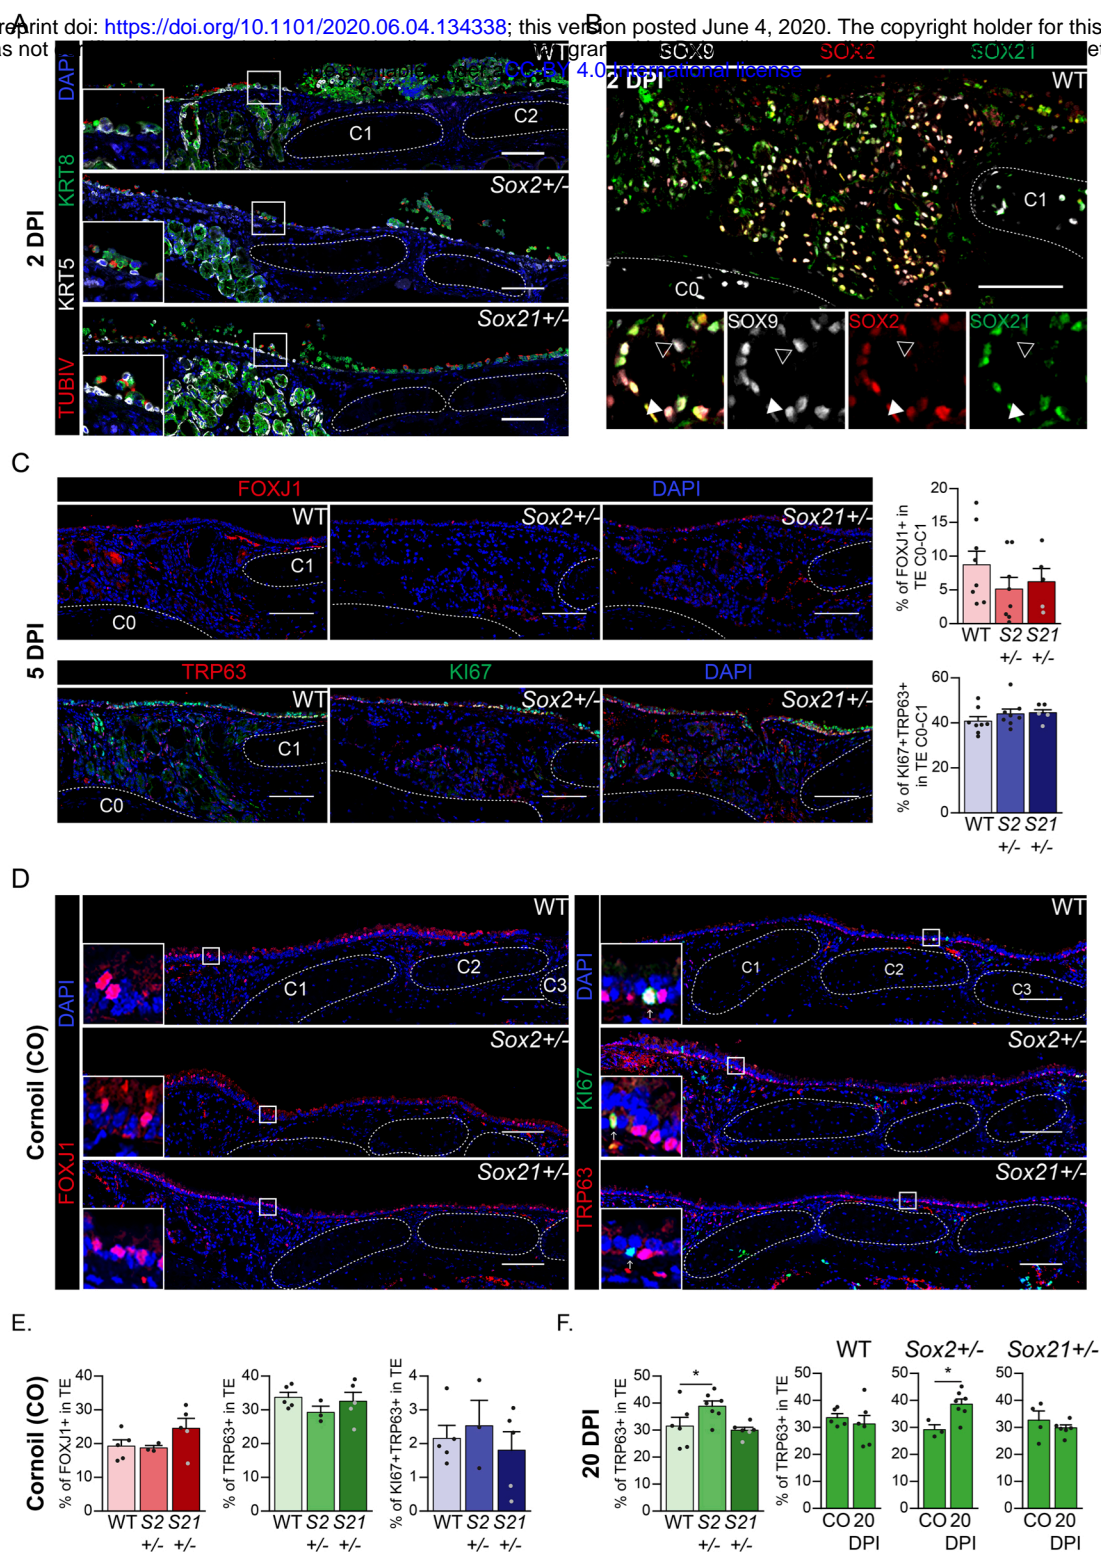

**Sup. Figure 3: Regeneration is delayed in SOX2 deficient tracheal epithelium**

(A) Immunofluorescence staining on tracheal sections of wildtype (WT), Sox2<sup>+/-</sup> and Sox21<sup>+/-</sup>, 2 days post injury (2 DPI) of Keratin 5 (KRT, grey), Keratin 8 (KRT8, green), TubulinIV (TUBIV, red).

(B) Tracheal section showing Submucosal Glands (SMGs) at 2 DPI of wildtype mice. SOX2 (red) and SOX21 (green) expression is detected in SOX9<sup>+</sup> SMG cells. Closed white arrowheads indicate cells only expressing SOX2 and SOX9, open arrowheads indicate cells only expressing SOX9. Scale bar = 100  $\mu$ m. Scale bar = 100  $\mu$ m. C = Cartilage ring.

(C) Immunofluorescence of FOXJ1<sup>+</sup> ciliated cells (top row) or TRP63<sup>+</sup> KI67<sup>+</sup> dividing basal cells (bottom row), 5 DPI in wildtype (WT), Sox2<sup>+/-</sup> and Sox21<sup>+/-</sup> mice. Scale bar = 100  $\mu$ m. Quantification of the number of FOXJ1<sup>+</sup> ciliated cells from C0 till C1 between genotypes. One-way ANOVA (WT n = 5, Sox2<sup>+/-</sup> n = 3, Sox21<sup>+/-</sup> n = 5, \* p<0.05)

(D) Immunofluorescence of FOXJ1<sup>+</sup> ciliated cells (left) or TRP63<sup>+</sup> KI67<sup>+</sup> dividing basal cells (right), on tracheal sections of cornioil exposed (CO) mice. Scale bar = 100  $\mu$ m.

(E) Quantification of the number of FOXJ1<sup>+</sup> ciliated cells, basal cells or dividing basal cells from C0 till C6 between genotypes in cornioil exposed (CO) mice. One-way ANOVA (WT n = 8, Sox2<sup>+/-</sup> n = 8, Sox21<sup>+/-</sup> n = 5)

(F) Quantification of the number of basal cells from C0 till C6 between genotypes. One-way ANOVA (WT n = 6, Sox2<sup>+/-</sup> n = 7, Sox21<sup>+/-</sup> n = 6, \* p<0.05). Quantification of basal cells, 20 DPI compared to CO animals of each WT, Sox2<sup>+/-</sup> and Sox21<sup>+/-</sup>. T-test (WT: CO n = 5 and 20DPI n = 6, Sox2<sup>+/-</sup>: CO n = 3 and 20DPI n = 7, Sox21<sup>+/-</sup>: CO n = 4 and 20DPI n = 6, \* p<0.05).

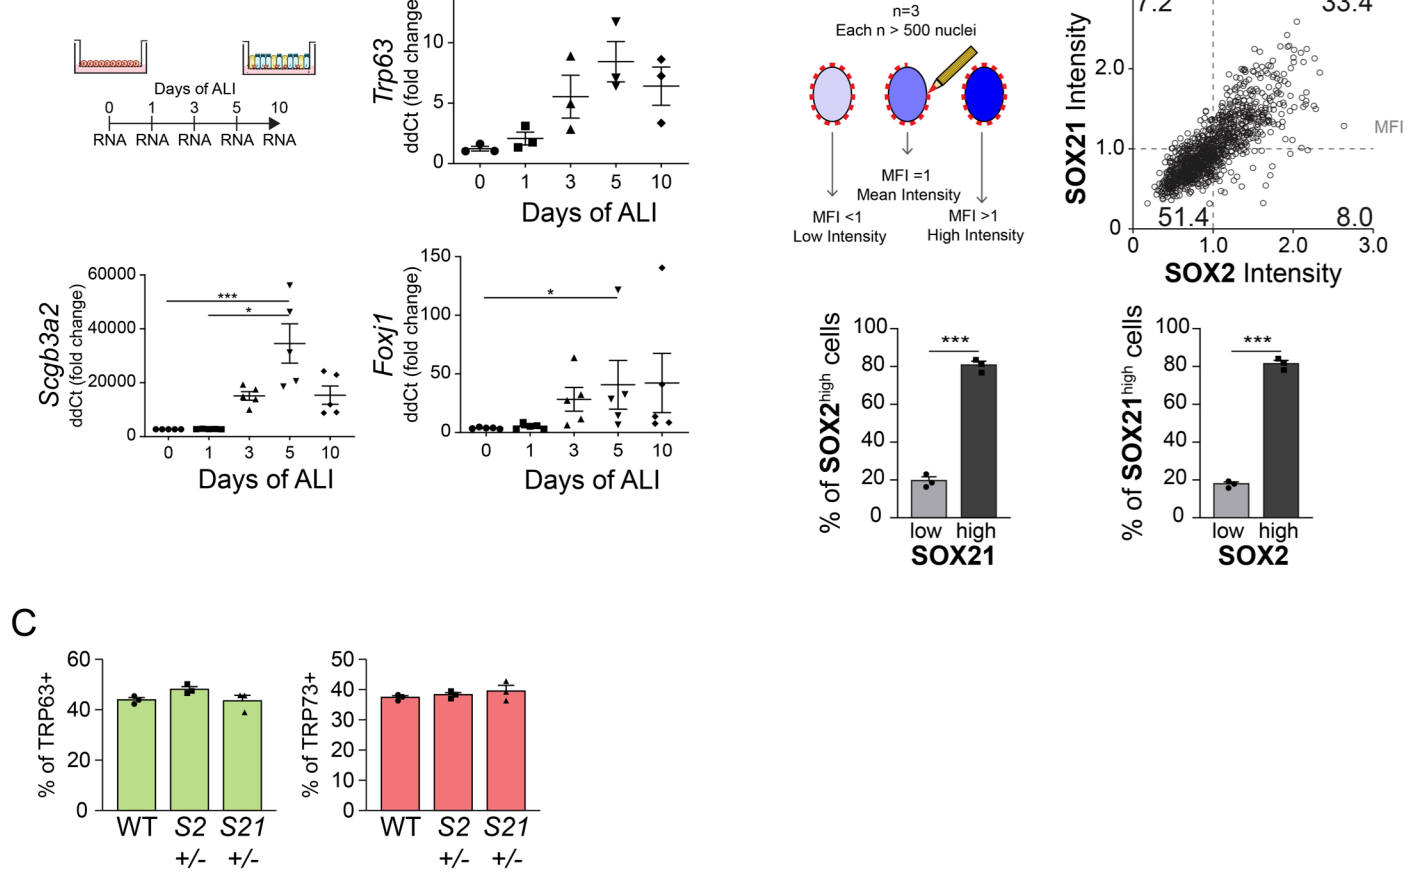

**Sup. Figure 4: SOX2 and SOX21 are inversely correlated with basal cell differentiation to ciliated cells**

(A) Schematic overview of mouse tracheal epithelial cell (MTEC) culture experiment. QPCR analysis of TRP63, SCGB3A2 and FOXJ1 expression during differentiation of MTECs on Air-Liquid Interface (ALI). One-way ANOVA (n=5; \* p<0.05, \*\*\* p<0.001).

(B) Schematic representation of the method to measure the mean fluorescence intensity (MFI) on day 10 of ALI. Dot-plot of the MFI of SOX2 (x-as) and SOX21 (y-as). The number represents the percentage of cells in each quadrant of the total. Bar graph is the quantification of SOX2 high expressing cells (MFI>1) that are either high (MFI>1) or low (MFI<1) in expression of SOX21 (left), and SOX21 high expressing cells (MFI>1) that are either high (MFI>1) or low (MFI<1) in expression of SOX2 (right). T-test (n=3; \*\*\* p<0.001).

(C) Quantification of the percentage of all TRP63+ basal cells and all TRP73+ cells belonging to figure 4E. One-way ANOVA (n=3).

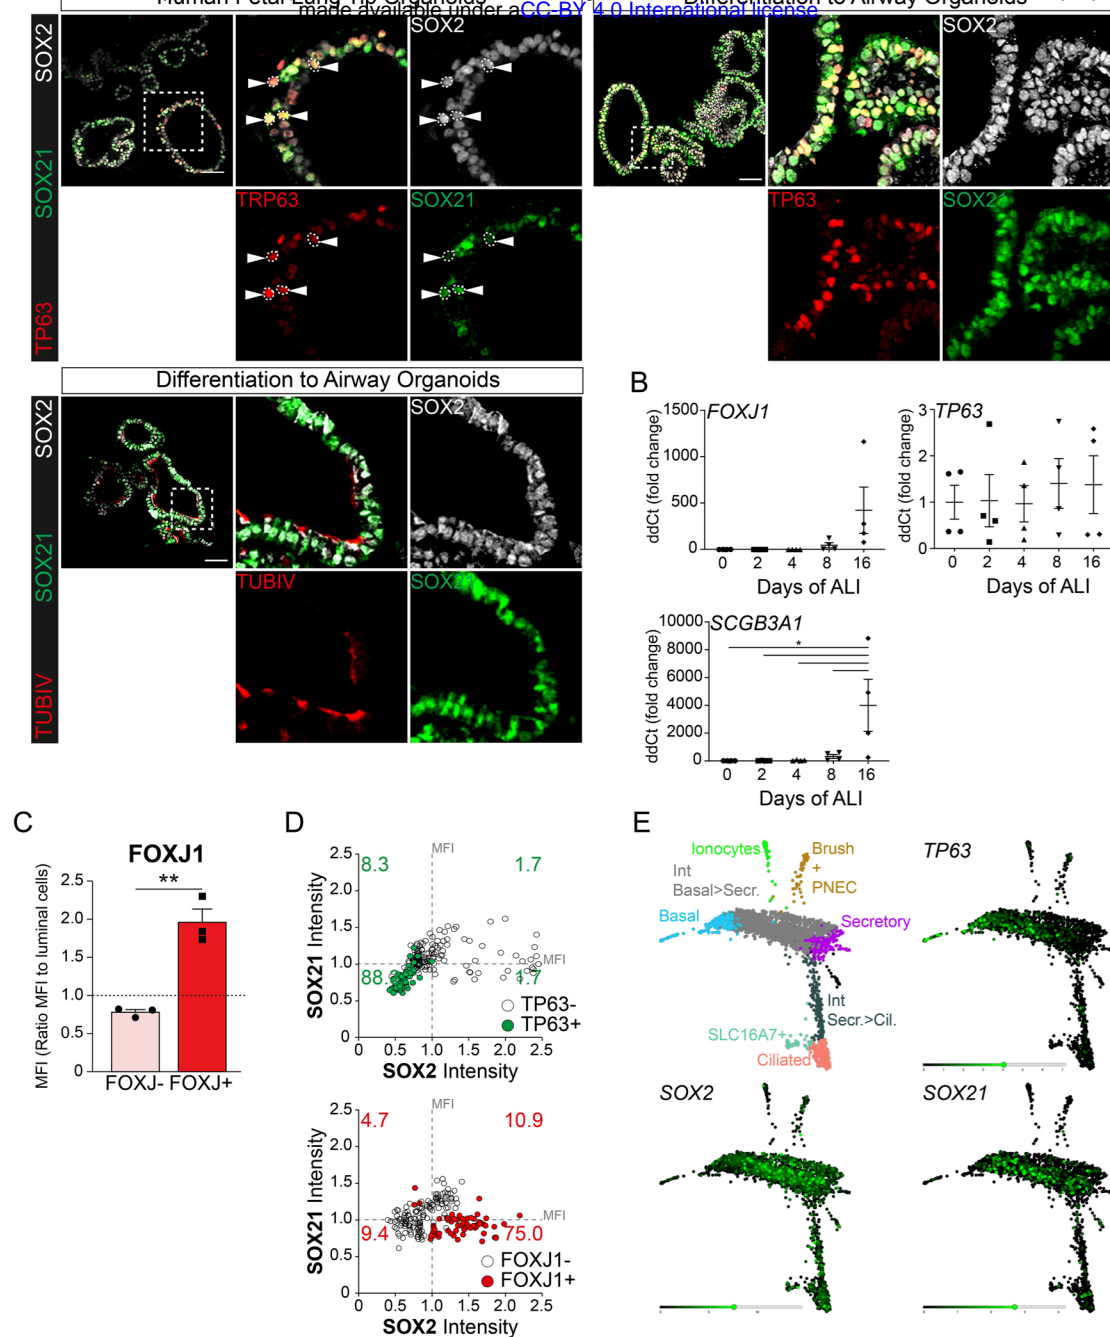

### Sup. Figure 5: SOX21 is expressed in human airway epithelium

(A) Immunofluorescence analysis of SOX2 (grey), TRP63 (red) and SOX21 (green) in fetal lung organoids. Closed arrowheads (▶) show cells positive for SOX2, TRP63 and SOX21. Fetal lung organoids differentiated to airway epithelium as shown by the presence of ciliated cells (TUBIV; red) or basal cells (TP63, red) have an abundant expression of SOX21 (green). Scale bar = 50  $\mu$ m.

(B) QPCR analysis of TP63, SCGB3A1 and FOXJ1 expression during differentiation of HPEBCs on Air-Liquid Interface (ALI). One-way ANOVA (n=4; \*\*\* p<0.001).

(C) Bar graphs shows the separation of luminal cells in FOXJ1+ versus FOXJ1- cells, belonging to figure 6D. A higher MFI was found in the cells selected for ciliated cells. T-test (n=3 (ALI cultures of 3 different donors); \*\*p<0.005).

(D) Dot-plot representation of the MFI of SOX2 (x-as) and SOX21 (y-as). The green filled circles are TP63+ basal cells (upper graph) and the number in each quadrant represents the percentage of basal cells in each square. The red filled circles are FOXJ1+ ciliated cells (lower graph) and the number in each quadrant represents the percentage of ciliated cells in each square. Each dot represents a cell and ALI cultures of 2 different donors are included.

(E) Previous published single cell RNA sequencing data on HPBEC ALI culture showing the expression levels of TP63, SOX2 and SOX21 in the different cell populations (Plasschaert, Zilionis et al. 2018).
